# Supplementary material for: Severe preeclampsia is associated with alterations in cytotrophoblasts of the smooth chorion
Source: Oxford University Press journal article supplement (doi:10.1242/dev.146100), 2017-01-01
Supplement: dev146100supp.pdf [file dev146100supp.pdf]

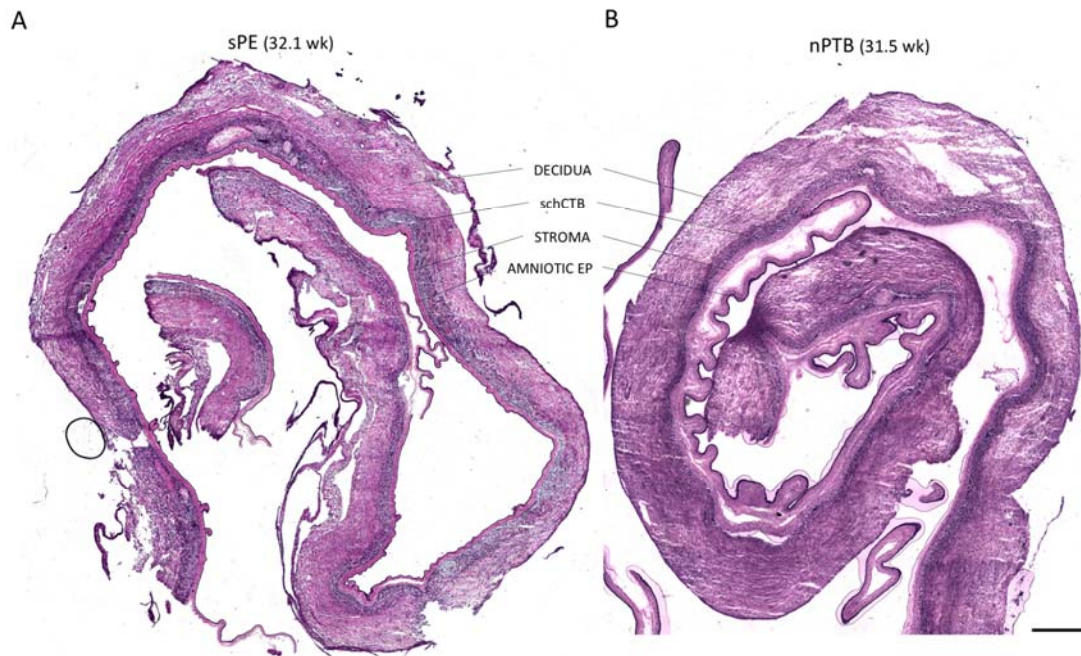

**Supplemental Figure 1.** Low power micrograph of H&E stained fetal membranes showed that severe preeclampsia (sPE) was associated with expansion of the CTB layer of the smooth chorion (schCTB), a phenomenon which was not observed in equivalent samples from cases of non infected preterm birth. n=5/group; scale bar: 500  $\mu$ m.

| sPE | nPTB | Symbol        | Title                                                          | $\Delta$ |
|-----|------|---------------|----------------------------------------------------------------|----------|
| ■   | ■    | CSH1          | chorionic somatomammotropin hormone 1                          | 26       |
| ■   | ■    | GSTA3         | glutathione S-transferase alpha 3                              | 13       |
| ■   | ■    | T1560         | T1560 protein                                                  | 12       |
| ■   | ■    | PAPPA         | pregnancy-associated plasma protein A, pappalysin 1            | 9        |
| ■   | ■    | XX-C2158C6.3  | putative novel transcript                                      | 8        |
| ■   | ■    | HTRA4         | HtrA serine peptidase 4                                        | 8        |
| ■   | ■    | PDIA3P1       | protein disulfide isomerase family A, member 3 pseudogene 1    | 8        |
| ■   | ■    | PAPPA-AS1     | PAPPA antisense RNA 1                                          | 7        |
| ■   | ■    | CSH2          | chorionic somatomammotropin hormone 2                          | 7        |
| ■   | ■    | RP11-78C3.1   | novel transcript                                               | 6        |
| ■   | ■    | RNU2-63P      | RNA, U2 small nuclear 63, pseudogene                           | 6        |
| ■   | ■    | TGFBR3L       | transforming growth factor, beta receptor III-like             | 6        |
| ■   | ■    | RP11-327J17.2 | novel transcript                                               | 5        |
| ■   | ■    | PAPPA2        | pappalysin 2                                                   | 4        |
| ■   | ■    | AC004878.2    | novel transcript                                               | 4        |
| ■   | ■    | LOC389765     | kinesin family member 27 pseudogene                            | 4        |
| ■   | ■    | LINC01028     | long intergenic non-protein coding RNA 1028                    | 4        |
| ■   | ■    | SCARNA9L      | small Cajal body-specific RNA 9-like                           | 4        |
| ■   | ■    | FAR2P3        | fatty acyl CoA reductase 2 pseudogene 3                        | 4        |
| ■   | ■    | SNORD114-28   | small nucleolar RNA, C/D box 114-28                            | 4        |
| ■   | ■    | GDPD1         | glycerophosphodiester phosphodiesterase domain containing 1    | 4        |
| ■   | ■    | CHRM5         | cholinergic receptor, muscarinic 5                             | 4        |
| ■   | ■    | KCNJ16        | potassium inwardly-rectifying channel, subfamily J, member 16  | 4        |
| ■   | ■    | RP11-246A10.1 | novel transcript                                               | 4        |
| ■   | ■    | RECK          | reversion-inducing-cysteine-rich protein with kazal motifs     | 4        |
| ■   | ■    | PDIA5         | protein disulfide isomerase family A, member 5                 | 4        |
| ■   | ■    | PSG11         | pregnancy specific beta-1-glycoprotein 11                      | 4        |
| ■   | ■    | RAB9BP1       | RAB9B, member RAS oncogene family pseudogene 1                 | 4        |
| ■   | ■    | LINC01338     | long intergenic non-protein coding RNA 1338                    | 4        |
| ■   | ■    | ADAM12        | ADAM metallopeptidase domain 12                                | 4        |
| ■   | ■    | FBXO9         | F-box protein 9                                                | 4        |
| ■   | ■    | DGCR11        | DiGeorge syndrome critical region gene 11 (non-protein coding) | 3        |
| ■   | ■    | SNORD8        | small nucleolar RNA, C/D box 8                                 | 3        |
| ■   | ■    | MAP7D3        | MAP7 domain containing 3                                       | 3        |
| ■   | ■    | SLC23A2       | solute carrier family 23 (ascorbic acid transporter), member 2 | 3        |
| ■   | ■    | LIFR          | leukemia inhibitory factor receptor alpha                      | 3        |
| ■   | ■    | HYAL4         | hyaluronoglucosaminidase 4                                     | 3        |
| ■   | ■    | AC004878.8    | novel transcript                                               | 3        |
| ■   | ■    | GPR126        | G protein-coupled receptor 126                                 | 3        |
| ■   | ■    | FGG           | fibrinogen gamma chain                                         | 3        |
| ■   | ■    | HEXB          | hexosaminidase B (beta polypeptide)                            | 3        |
| ■   | ■    | RNU6-989P     | RNA, U6 small nuclear 989, pseudogene                          | 3        |
| ■   | ■    | POTEE         | POTE ankyrin domain family, member E                           | 3        |
| ■   | ■    | POTEF         | POTE ankyrin domain family, member F                           | 3        |
| ■   | ■    | MIR924        | microRNA 924                                                   | 3        |
| ■   | ■    | RP4-693M11.3  | novel transcript, antisense to DNAL1                           | 3        |
| ■   | ■    | NAIP          | NLR family, apoptosis inhibitory protein                       | 3        |
| ■   | ■    | DDX43         | DEAD (Asp-Glu-Ala-Asp) box polypeptide 43                      | 3        |
| ■   | ■    | SNORA6        | small nucleolar RNA, H/ACA box 6                               | 3        |
| ■   | ■    | MEP1A         | mepirin A, alpha (PABA peptide hydrolase)                      | 3        |

| sPE | nPTB | Symbol        | Title                                                                                                        | $\Delta$ |
|-----|------|---------------|--------------------------------------------------------------------------------------------------------------|----------|
|     |      | PDPR          | pyruvate dehydrogenase phosphatase regulatory subunit                                                        | 3        |
|     |      | BGN           | biglycan                                                                                                     | 3        |
|     |      | LOC440173     | uncharacterized LOC440173                                                                                    | 3        |
|     |      | LOC101926943  | uncharacterized LOC101926943                                                                                 | 3        |
|     |      | RNU12         | RNA, U12 small nuclear                                                                                       | 3        |
|     |      | RNA5SP435     | RNA, 5S ribosomal pseudogene 435                                                                             | 3        |
|     |      | SH3BP5-AS1    | SH3BP5 antisense RNA 1                                                                                       | 3        |
|     |      | CTD-2363C16.1 | novel transcript                                                                                             | 3        |
|     |      | C8orf48       | chromosome 8 open reading frame 48                                                                           | 3        |
|     |      | LRRC17        | leucine rich repeat containing 17                                                                            | 3        |
|     |      | RNU7-123P     | RNA, U7 small nuclear 123 pseudogene                                                                         | 3        |
|     |      | ZNF283        | zinc finger protein 283                                                                                      | 3        |
|     |      | KCNJ2         | potassium inwardly-rectifying channel, subfamily J, member 2                                                 | 3        |
|     |      | ITM2C         | integral membrane protein 2C                                                                                 | 3        |
|     |      | SUN3          | Sad1 and UNC84 domain containing 3                                                                           | 2        |
|     |      | LOC220729     | succinate dehydrogenase complex, subunit A, flavoprotein (Fp) pseudogene                                     | 2        |
|     |      | KRT223P       | keratin 223 pseudogene                                                                                       | 2        |
|     |      | CXorf58       | chromosome X open reading frame 58                                                                           | 2        |
|     |      | LOC100506922  | basic proline-rich protein-like                                                                              | 2        |
|     |      | EXO5          | exonuclease 5                                                                                                | 2        |
|     |      | SMAD4         | SMAD family member 4                                                                                         | 2        |
|     |      | ENG           | endoglin                                                                                                     | 2        |
|     |      | RP11-288L9.1  | putative novel transcript                                                                                    | 2        |
|     |      | TSPAN10       | tetraspanin 10                                                                                               | 2        |
|     |      | LOC100506746  | uncharacterized LOC100506746                                                                                 | 2        |
|     |      | MIR3942       | microRNA 3942                                                                                                | 2        |
|     |      | MT1F          | metallothionein 1F                                                                                           | 2        |
|     |      | MKLN1-AS      | MKLN1 antisense RNA                                                                                          | 2        |
|     |      | MAGEH1        | melanoma antigen family H, 1                                                                                 | 2        |
|     |      | LOC101928062  | uncharacterized LOC101928062                                                                                 | 2        |
|     |      | PCBD2         | pterin-4 alpha-carbinolamine dehydratase/dimerization cofactor of hepatocyte nuclear factor 1 alpha (TCF1) 2 | 2        |
|     |      | TDRD6         | tudor domain containing 6                                                                                    | 2        |
|     |      | ZNF594        | zinc finger protein 594                                                                                      | 2        |
|     |      | ICA1L         | islet cell autoantigen 1,69kDa-like                                                                          | 2        |
|     |      | SPATA17       | spermatogenesis associated 17                                                                                | 2        |
|     |      | NBPF1         | neuroblastoma breakpoint family, member 1                                                                    | 2        |
|     |      | PTPRQ         | protein tyrosine phosphatase, receptor type, Q                                                               | 2        |
|     |      | RNU6-806P     | RNA, U6 small nuclear 806, pseudogene                                                                        | 2        |
|     |      | RPS6KA6       | ribosomal protein S6 kinase, 90kDa, polypeptide 6                                                            | 2        |
|     |      | RP11-317G6.1  | novel transcript, antisense to HERC1                                                                         | 2        |
|     |      | SLC29A3       | solute carrier family 29 (equilibrative nucleoside transporter), member 3                                    | 2        |
|     |      | CABLES1       | Cdk5 and Abl enzyme substrate 1                                                                              | 2        |
|     |      | ATP8A2        | ATPase, aminophospholipid transporter, class I, type 8A, member 2                                            | 2        |
|     |      | MIR4759       | microRNA 4759                                                                                                | 2        |
|     |      | HDAC5         | histone deacetylase 5                                                                                        | 2        |
|     |      | TGIF2LY       | TGFB-induced factor homeobox 2-like, Y-linked                                                                | 2        |
|     |      | EOGT          | EGF domain-specific O-linked N-acetylglucosamine (GlcNAc) transferase                                        | 2        |
|     |      | SCG2          | secretogranin II                                                                                             | 2        |
|     |      | ERVV-2        | endogenous retrovirus group V, member 2                                                                      | 2        |
|     |      | TCEA3         | transcription elongation factor A (SII), 3                                                                   | 2        |

| sPE | nPTB | Symbol       | Title                                                               | $\Delta$ |
|-----|------|--------------|---------------------------------------------------------------------|----------|
| ■   | ■    | TNKS2        | tankyrase, TRF1-interacting ankyrin-related ADP-ribose polymerase 2 | 2        |
| ■   | ■    | RNU6-858P    | RNA, U6 small nuclear 858, pseudogene                               | 2        |
| ■   | ■    | RP11-545P7.4 | novel transcript, antisense to C12orf52                             | 2        |
| ■   | ■    | LINC01003    | long intergenic non-protein coding RNA 1003                         | 2        |
| ■   | ■    | CROCCP3      | ciliary rootlet coiled-coil, rootletin pseudogene 3                 | 2        |
| ■   | ■    | ZFYVE9       | zinc finger, FYVE domain containing 9                               | 2        |
| ■   | ■    | RNU6-77P     | RNA, U6 small nuclear 77, pseudogene                                | 2        |
| ■   | ■    | HABP4        | hyaluronan binding protein 4                                        | 2        |
| ■   | ■    | OR10A3       | olfactory receptor, family 10, subfamily A, member 3                | 2        |
| ■   | ■    | RP1-50J22.4  | putative novel transcript                                           | 2        |
| ■   | ■    | SH3BP5       | SH3-domain binding protein 5 (BTK-associated)                       | 2        |
| ■   | ■    | SPATA17-AS1  | SPATA17 antisense RNA 1                                             | 2        |
| ■   | ■    | USP50        | ubiquitin specific peptidase 50                                     | 2        |
| ■   | ■    | DCLRE1C      | DNA cross-link repair 1C                                            | 2        |
| ■   | ■    | PROSC        | proline synthetase co-transcribed homolog (bacterial)               | 2        |
| ■   | ■    | RP11-585P4.5 | novel transcript, antisense to GLIPR1                               | 2        |
| ■   | ■    | CTD-2501M5.1 | novel transcript                                                    | -2       |
| ■   | ■    | KIAA1958     | KIAA1958                                                            | -2       |
| ■   | ■    | NNMT         | nicotinamide N-methyltransferase                                    | -2       |
| ■   | ■    | RNA5SP356    | RNA, 5S ribosomal pseudogene 356                                    | -2       |
| ■   | ■    | RNU6-557P    | RNA, U6 small nuclear 557, pseudogene                               | -2       |
| ■   | ■    | LOC100129617 | uncharacterized LOC100129617                                        | -2       |
| ■   | ■    | P2RY6        | pyrimidinergic receptor P2Y, G-protein coupled, 6                   | -2       |
| ■   | ■    | RNU6-1157P   | RNA, U6 small nuclear 1157, pseudogene                              | -2       |
| ■   | ■    | TRIM22       | tripartite motif containing 22                                      | -2       |
| ■   | ■    | MAST4        | microtubule associated serine/threonine kinase family member 4      | -2       |
| ■   | ■    | HLA-B        | major histocompatibility complex, class I, B                        | -2       |
| ■   | ■    | CD80         | CD80 molecule                                                       | -2       |
| ■   | ■    | HLA-A        | major histocompatibility complex, class I, A                        | -2       |
| ■   | ■    | IL10RA       | interleukin 10 receptor, alpha                                      | -2       |
| ■   | ■    | EPHA5-AS1    | EPHA5 antisense RNA 1                                               | -2       |
| ■   | ■    | RP11-217B7.2 | novel transcript                                                    | -2       |
| ■   | ■    | NPPB         | natriuretic peptide B                                               | -2       |
| ■   | ■    | HMMR         | hyaluronan-mediated motility receptor (RHAMM)                       | -2       |
| ■   | ■    | LOC102723672 | uncharacterized LOC102723672                                        | -2       |
| ■   | ■    | PSTPIP2      | proline-serine-threonine phosphatase interacting protein 2          | -2       |
| ■   | ■    | ITK          | IL2-inducible T-cell kinase                                         | -2       |
| ■   | ■    | RNA5SP234    | RNA, 5S ribosomal pseudogene 234                                    | -2       |
| ■   | ■    | CASP4        | caspase 4, apoptosis-related cysteine peptidase                     | -2       |
| ■   | ■    | MIR1204      | microRNA 1204                                                       | -2       |
| ■   | ■    | LINC01057    | long intergenic non-protein coding RNA 1057                         | -2       |
| ■   | ■    | CNN3         | calponin 3, acidic                                                  | -2       |
| ■   | ■    | SNAR-C2      | small ILF3/NF90-associated RNA C2                                   | -2       |
| ■   | ■    | TMEM52B      | transmembrane protein 52B                                           | -2       |
| ■   | ■    | RNA5SP88     | RNA, 5S ribosomal pseudogene 88                                     | -2       |
| ■   | ■    | RASA3        | RAS p21 protein activator 3                                         | -2       |
| ■   | ■    | KRT17P1      | keratin 17 pseudogene 1                                             | -2       |
| ■   | ■    | NUAK2        | NUAK family, SNF1-like kinase, 2                                    | -2       |
| ■   | ■    | RNA5-8SP3    | RNA, 5.8S ribosomal pseudogene 3                                    | -2       |
| ■   | ■    | SNORA84      | small nucleolar RNA, H/ACA box 84                                   | -2       |

| sPE | nPTB | Symbol         | Title                                                                         | $\Delta$ |
|-----|------|----------------|-------------------------------------------------------------------------------|----------|
|     |      | CLDN6          | claudin 6                                                                     | -2       |
|     |      | RNA5SP22       | RNA, 5S ribosomal pseudogene 22                                               | -2       |
|     |      | EPCAM          | epithelial cell adhesion molecule                                             | -2       |
|     |      | IFITM1         | interferon induced transmembrane protein 1                                    | -2       |
|     |      | RNU6-707P      | RNA, U6 small nuclear 707, pseudogene                                         | -2       |
|     |      | CD47           | CD47 molecule                                                                 | -2       |
|     |      | LOC391003      | PRAME family member-like                                                      | -2       |
|     |      | TAP1           | transporter 1, ATP-binding cassette, sub-family B (MDR/TAP)                   | -2       |
|     |      | SLC44A3        | solute carrier family 44, member 3                                            | -2       |
|     |      | YBX3P1         | Y box binding protein 3 pseudogene 1                                          | -2       |
|     |      | HIST1H2AE      | histone cluster 1, H2ae                                                       | -2       |
|     |      | RNU6-74P       | RNA, U6 small nuclear 74, pseudogene                                          | -2       |
|     |      | IL4R           | interleukin 4 receptor                                                        | -2       |
|     |      | RP11-290L1.3   | novel transcript antisense to PHLDA1                                          | -2       |
|     |      | SLAMF8         | SLAM family member 8                                                          | -2       |
|     |      | IL2RG          | interleukin 2 receptor, gamma                                                 | -3       |
|     |      | PLAUR          | plasminogen activator, urokinase receptor                                     | -3       |
|     |      | RP11-10J5.1    | putative novel transcript                                                     | -3       |
|     |      | VTRNA1-3       | vault RNA 1-3                                                                 | -3       |
|     |      | RP11-212I21.2  | novel transcript                                                              | -3       |
|     |      | SNORD50B       | small nucleolar RNA, C/D box 50B                                              | -3       |
|     |      | IRF1           | interferon regulatory factor 1                                                | -3       |
|     |      | CD96           | CD96 molecule                                                                 | -3       |
|     |      | MIR3529        | microRNA 3529                                                                 | -3       |
|     |      | C6orf48        | chromosome 6 open reading frame 48                                            | -3       |
|     |      | DRAM1          | DNA-damage regulated autophagy modulator 1                                    | -3       |
|     |      | HIST1H3F       | histone cluster 1, H3f                                                        | -3       |
|     |      | PLAU           | plasminogen activator, urokinase                                              | -3       |
|     |      | NEAT1          | nuclear paraspeckle assembly transcript 1 (non-protein coding) (microRNA 612) | -3       |
|     |      | RP4-694A7.2    | putative novel transcript                                                     | -3       |
|     |      | SNORD52        | small nucleolar RNA, C/D box 52                                               | -3       |
|     |      | CCL4           | chemokine (C-C motif) ligand 4                                                | -3       |
|     |      | CD48           | CD48 molecule                                                                 | -3       |
|     |      | XXbac-BPG252P0 | novel transcript antisense to IER3                                            | -3       |
|     |      | RNY4P20        | RNA, Ro-associated Y4 pseudogene 20                                           | -3       |
|     |      | RNU6-1316P     | RNA, U6 small nuclear 1316, pseudogene                                        | -3       |
|     |      | ANKRD54        | ankyrin repeat domain 54                                                      | -3       |
|     |      | SKA3           | spindle and kinetochore associated complex subunit 3                          | -3       |
|     |      | GZMB           | granzyme B (granzyme 2, cytotoxic T-lymphocyte-associated serine esterase 1)  | -3       |
|     |      | RNU4-62P       | RNA, U4 small nuclear 62, pseudogene                                          | -3       |
|     |      | RNU6-1187P     | RNA, U6 small nuclear 1187, pseudogene                                        | -3       |
|     |      | RP1-239B22.5   | antisense to KCNJ11 and overlapping to a novel gene                           | -3       |
|     |      | GBP1P1         | guanylate binding protein 1, interferon-inducible pseudogene 1                | -3       |
|     |      | SQRDL          | sulfide quinone reductase-like (yeast)                                        | -3       |
|     |      | RNU6-226P      | RNA, U6 small nuclear 226, pseudogene                                         | -3       |
|     |      | CXCL2          | chemokine (C-X-C motif) ligand 2                                              | -3       |
|     |      | HIST1H2AK      | histone cluster 1, H2ak                                                       | -3       |
|     |      | MIR28          | microRNA 28                                                                   | -3       |
|     |      | MIR3671        | microRNA 3671                                                                 | -3       |
|     |      | RP11-102L12.2  | novel transcript antisense to RASGRP1                                         | -3       |



| sPE | nPTB | Symbol       | Title                                                        | $\Delta$ |
|-----|------|--------------|--------------------------------------------------------------|----------|
|     |      | RNU6-1330P   | RNA, U6 small nuclear 1330, pseudogene                       | -3       |
|     |      | AREG         | amphiregulin                                                 | -3       |
|     |      | HIST1H4L     | histone cluster 1, H4I                                       | -3       |
|     |      | GBP2         | guanylate binding protein 2, interferon-inducible            | -3       |
|     |      | C10orf55     | chromosome 10 open reading frame 55                          | -3       |
|     |      | SOCS3        | suppressor of cytokine signaling 3                           | -3       |
|     |      | HIST1H3I     | histone cluster 1, H3i                                       | -3       |
|     |      | MIR1323      | microRNA 1323                                                | -3       |
|     |      | LOC541472    | uncharacterized LOC541472                                    | -4       |
|     |      | SNORD16      | small nucleolar RNA, C/D box 16                              | -4       |
|     |      | SOCS1        | suppressor of cytokine signaling 1                           | -4       |
|     |      | SIPA1L1      | signal-induced proliferation-associated 1 like 1             | -4       |
|     |      | RP11-92K15.1 | novel transcript                                             | -4       |
|     |      | FOSL1        | FOS-like antigen 1                                           | -4       |
|     |      | MIR302A      | microRNA 302a                                                | -4       |
|     |      | RNU6-890P    | RNA, U6 small nuclear 890, pseudogene                        | -4       |
|     |      | GBP1         | guanylate binding protein 1, interferon-inducible            | -4       |
|     |      | SNORA29      | small nucleolar RNA, H/ACA box 29                            | -4       |
|     |      | SNORD63      | small nucleolar RNA, C/D box 63                              | -4       |
|     |      | JUNB         | jun B proto-oncogene                                         | -4       |
|     |      | CCL4L2       | chemokine (C-C motif) ligand 4-like 2                        | -4       |
|     |      | SLAMF7       | SLAM family member 7                                         | -4       |
|     |      | KRT17        | keratin 17                                                   | -4       |
|     |      | RNU6-638P    | RNA, U6 small nuclear 638, pseudogene                        | -4       |
|     |      | CCL13        | chemokine (C-C motif) ligand 13                              | -4       |
|     |      | KLHL22-IT1   | KLHL22 intronic transcript 1 (non-protein coding)            | -5       |
|     |      | CD24         | CD24 molecule                                                | -5       |
|     |      | BCL2A1       | BCL2-related protein A1                                      | -5       |
|     |      | FGFR2        | fibroblast growth factor receptor 2                          | -5       |
|     |      | HRASLS2      | HRAS-like suppressor 2                                       | -5       |
|     |      | ITGA2        | integrin, alpha 2 (CD49B, alpha 2 subunit of VLA-2 receptor) | -5       |
|     |      | CCL2         | chemokine (C-C motif) ligand 2                               | -5       |
|     |      | CCL5         | chemokine (C-C motif) ligand 5                               | -6       |
|     |      | CD3D         | CD3d molecule, delta (CD3-TCR complex)                       | -6       |
|     |      | LINC00278    | long intergenic non-protein coding RNA 278                   | -6       |
|     |      | SNORD75      | small nucleolar RNA, C/D box 75                              | -6       |
|     |      | MIR548K      | microRNA 548k                                                | -6       |
|     |      | ICAM1        | intercellular adhesion molecule 1                            | -6       |
|     |      | RNU6-767P    | RNA, U6 small nuclear 767, pseudogene                        | -6       |
|     |      | OLR1         | oxidized low density lipoprotein (lectin-like) receptor 1    | -7       |
|     |      | BMP2         | bone morphogenetic protein 2                                 | -7       |
|     |      | RP1-67K17.4  | putative novel transcript                                    | -7       |
|     |      | RNU6-874P    | RNA, U6 small nuclear 874, pseudogene                        | -7       |
|     |      | PMAIP1       | phorbol-12-myristate-13-acetate-induced protein 1            | -8       |
|     |      | CXCL10       | chemokine (C-X-C motif) ligand 10                            | -9       |
|     |      | GBP4         | guanylate binding protein 4                                  | -9       |
|     |      | SNORD59A     | small nucleolar RNA, C/D box 59A                             | -12      |
|     |      | RNU6-1154P   | RNA, U6 small nuclear 1154, pseudogene                       | -14      |
|     |      | GBP5         | guanylate binding protein 5                                  | -20      |

RMA Intensity

sPE nPTB

0 (log2) 12

| sPE | nPTB | Symbol | Title | $\Delta$ |
|-----|------|--------|-------|----------|
|-----|------|--------|-------|----------|

**Supplemental Figure 2.** Global transcriptional profiling of cytotrophoblasts from the smooth chorion revealed sPE-associated aberrations in gene expression as compared to the equivalent subpopulation of cells from cases of non-infected preterm birth. The heatmap lists genes that were differentially expressed by 2-fold or greater. The fold changes are shown on the right (.) $\Delta$

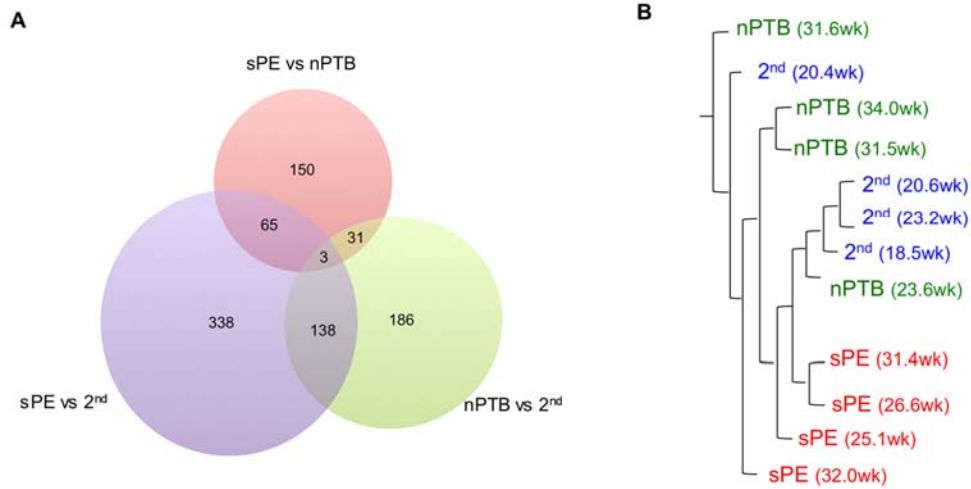

**Supplemental Figure 3.** Overview of the global transcriptional profiling data for cytotrophoblasts of the smooth chorion in severe preeclampsia (sPE), non-infected preterm birth (nPTB) and the late second trimester of normal pregnancy (2<sup>nd</sup> Late). (A) Overlap of the differentially expressed genes in the three sample groups. Circle sizes are proportional to the number of differentially expressed genes. (B) Hierarchical clustering failed to completely separate the nPTB and Late 2<sup>nd</sup> trimester samples. In contrast, the sPE data clustered together.



| sPE | 2 <sup>nd</sup> | Symbol        | Title                                                                               | $\Delta$ |
|-----|-----------------|---------------|-------------------------------------------------------------------------------------|----------|
|     |                 | MT1H          | metallothionein 1H                                                                  | 23       |
|     |                 | MT1G          | metallothionein 1G                                                                  | 13       |
|     |                 | KRT24         | keratin 24                                                                          | 11       |
|     |                 | CDSN          | corneodesmosin                                                                      | 10       |
|     |                 | PAPPA         | pregnancy-associated plasma protein A, pappalysin 1                                 | 8        |
|     |                 | OR2T5         | olfactory receptor, family 2, subfamily T, member 5                                 | 6        |
|     |                 | RP11-78C3.1   | novel transcript                                                                    | 5        |
|     |                 | PAPPA-AS1     | PAPPA antisense RNA 1                                                               | 5        |
|     |                 | KRT223P       | keratin 223 pseudogene                                                              | 5        |
|     |                 | TRAJ59        | T cell receptor alpha joining 59 (non-functional)                                   | 4        |
|     |                 | ATP13A4-AS1   | ATP13A4 antisense RNA 1                                                             | 4        |
|     |                 | NRCAM         | neuronal cell adhesion molecule                                                     | 4        |
|     |                 | MTHFD1        | formyltetrahydrofolate synthetase                                                   | 4        |
|     |                 | SCEL          | sciellin                                                                            | 4        |
|     |                 | PTPRQ         | protein tyrosine phosphatase, receptor type, Q                                      | 4        |
|     |                 | RP11-407H12.8 | novel transcript                                                                    | 4        |
|     |                 | GSTA3         | glutathione S-transferase alpha 3                                                   | 4        |
|     |                 | RNY4P23       | RNA, Ro-associated Y4 pseudogene 23                                                 | 4        |
|     |                 | T1560         | T1560 protein                                                                       | 4        |
|     |                 | LOC103352541  | uncharacterized LOC103352541                                                        | 4        |
|     |                 | LOC100130476  | uncharacterized LOC100130476                                                        | 4        |
|     |                 | PRKXP1        | protein kinase, X-linked, pseudogene 1                                              | 4        |
|     |                 | RNU12         | RNA, U12 small nuclear                                                              | 3        |
|     |                 | SNORD48       | small nucleolar RNA, C/D box 48                                                     | 3        |
|     |                 | RNU6-1065P    | RNA, U6 small nuclear 1065, pseudogene                                              | 3        |
|     |                 | MIR3908       | microRNA 3908                                                                       | 3        |
|     |                 | LOC255187     | uncharacterized LOC255187                                                           | 3        |
|     |                 | TTC21B-AS1    | TTC21B antisense RNA 1                                                              | 3        |
|     |                 | MIR630        | microRNA 630                                                                        | 3        |
|     |                 | PLA2G4A       | phospholipase A2, group IVA (cytosolic, calcium-dependent)                          | 3        |
|     |                 | LOC101928461  | uncharacterized LOC101928461                                                        | 3        |
|     |                 | RNU5F-4P      | RNA, U5F small nuclear 4, pseudogene                                                | 3        |
|     |                 | RP11-65J21.1  | novel transcript                                                                    | 3        |
|     |                 | LPAL2         | lipoprotein, Lp(a)-like 2, pseudogene                                               | 3        |
|     |                 | SNORA6        | small nucleolar RNA, H/ACA box 6                                                    | 3        |
|     |                 | DNAH11        | dynein, axonemal, heavy chain 11                                                    | 3        |
|     |                 | AQP9          | aquaporin 9                                                                         | 3        |
|     |                 | IL13RA2       | interleukin 13 receptor, alpha 2                                                    | 3        |
|     |                 | TGFBR3L       | transforming growth factor, beta receptor III-like                                  | 3        |
|     |                 | LINC01338     | long intergenic non-protein coding RNA 1338                                         | 3        |
|     |                 | LINC00330     | long intergenic non-protein coding RNA 330                                          | 3        |
|     |                 | RNU6-732P     | RNA, U6 small nuclear 732, pseudogene                                               | 3        |
|     |                 | FCGR1C        | Fc fragment of IgG, high affinity I <sub>c</sub> , receptor (CD64), pseudogene      | 3        |
|     |                 | SERPINA3      | serpin peptidase inhibitor, clade A (alpha-1 antiproteinase, antitrypsin), member 3 | 3        |
|     |                 | KDR           | kinase insert domain receptor (a type III receptor tyrosine kinase)                 | 3        |
|     |                 | IGHD2-8       | immunoglobulin heavy diversity 2-8                                                  | 3        |
|     |                 | ICA1L         | islet cell autoantigen 1,69kDa-like                                                 | 3        |
|     |                 | RNA5SP444     | RNA, 5S ribosomal pseudogene 444                                                    | 3        |
|     |                 | RP11-458D21.1 | novel transcript                                                                    | 3        |
|     |                 | SMAD4         | SMAD family member 4                                                                | 3        |

| sPE | 2 <sup>nd</sup> | Symbol        | Title                                                          | $\Delta$ |
|-----|-----------------|---------------|----------------------------------------------------------------|----------|
|     |                 | HAS2          | hyaluronan synthase 2                                          | 3        |
|     |                 | RN7SKP260     | RNA, 7SK small nuclear pseudogene 260                          | 3        |
|     |                 | RNU4-76P      | RNA, U4 small nuclear 76, pseudogene                           | 3        |
|     |                 | RP11-246K15.1 | novel transcript                                               | 3        |
|     |                 | SORBS1        | sorbin and SH3 domain containing 1                             | 3        |
|     |                 | ARG1          | arginase 1                                                     | 3        |
|     |                 | FBXO9         | F-box protein 9                                                | 3        |
|     |                 | RNU6-540P     | RNA, U6 small nuclear 540, pseudogene                          | 3        |
|     |                 | SCARNA17      | small Cajal body-specific RNA 17                               | 3        |
|     |                 | LOC101927483  | uncharacterized LOC101927483                                   | 3        |
|     |                 | CSH1          | chorionic somatomammotropin hormone 1                          | 3        |
|     |                 | POTEF         | POTE ankyrin domain family, member F                           | 3        |
|     |                 | MUM1L1        | melanoma associated antigen (mutated) 1-like 1                 | 2        |
|     |                 | RNF185-AS1    | RNF185 antisense RNA 1                                         | 2        |
|     |                 | RNU5B-4P      | RNA, U5B small nuclear 4, pseudogene                           | 2        |
|     |                 | LL0XNC01-237H | putative novel transcript                                      | 2        |
|     |                 | RNU6-453P     | RNA, U6 small nuclear 453, pseudogene                          | 2        |
|     |                 | RNU6-65P      | RNA, U6 small nuclear 65, pseudogene                           | 2        |
|     |                 | RP11-347J14.8 | putative novel transcript                                      | 2        |
|     |                 | AC008440.10   | putative novel transcript                                      | 2        |
|     |                 | OR5M1         | olfactory receptor, family 5, subfamily M, member 1            | 2        |
|     |                 | RNU6-1043P    | RNA, U6 small nuclear 1043, pseudogene                         | 2        |
|     |                 | RP11-459O1.2  | putative novel transcript                                      | 2        |
|     |                 | RNU7-80P      | RNA, U7 small nuclear 80 pseudogene                            | 2        |
|     |                 | IPW           | imprinted in Prader-Willi syndrome (non-protein coding)        | 2        |
|     |                 | MIR4540       | microRNA 4540                                                  | 2        |
|     |                 | RNU2-11P      | RNA, U2 small nuclear 11, pseudogene                           | 2        |
|     |                 | RNU7-51P      | RNA, U7 small nuclear 51 pseudogene                            | 2        |
|     |                 | RP11-875H7.1  | novel transcript                                               | 2        |
|     |                 | PPP1R3C       | protein phosphatase 1, regulatory subunit 3C                   | 2        |
|     |                 | ANKFN1        | ankyrin-repeat and fibronectin type III domain containing 1    | 2        |
|     |                 | PROSP         | protein S pseudogene (beta)                                    | 2        |
|     |                 | SCEL-AS1      | SCEL antisense RNA 1                                           | 2        |
|     |                 | AC004878.2    | novel transcript                                               | 2        |
|     |                 | RNU12-2P      | RNA, U12 small nuclear 2, pseudogene                           | 2        |
|     |                 | LOC102724050  | uncharacterized LOC102724050                                   | 2        |
|     |                 | MIR4307       | microRNA 4307                                                  | 2        |
|     |                 | RNU6-919P     | RNA, U6 small nuclear 919, pseudogene                          | 2        |
|     |                 | MKLN1-AS      | MKLN1 antisense RNA                                            | 2        |
|     |                 | LOC101926943  | uncharacterized LOC101926943                                   | 2        |
|     |                 | ATP13A4       | ATPase type 13A4                                               | 2        |
|     |                 | LOC102724077  | uncharacterized LOC102724077                                   | 2        |
|     |                 | OR1S1         | olfactory receptor, family 1, subfamily S, member 1            | 2        |
|     |                 | KRTAP6-2      | keratin associated protein 6-2                                 | 2        |
|     |                 | LOC730081     | uncharacterized LOC730081                                      | 2        |
|     |                 | FOXJ3         | forkhead box J3                                                | 2        |
|     |                 | CSH2          | chorionic somatomammotropin hormone 2                          | 2        |
|     |                 | RP11-661A12.4 | 7SK RNA                                                        | 2        |
|     |                 | OR2T34        | olfactory receptor, family 2, subfamily T, member 34           | 2        |
|     |                 | VPS37D        | vacuolar protein sorting 37 homolog D ( <i>S. cerevisiae</i> ) | 2        |

| sPE | 2 <sup>nd</sup> | Symbol       | Title                                                                            | $\Delta$ |
|-----|-----------------|--------------|----------------------------------------------------------------------------------|----------|
|     |                 | OSER1-AS1    | OSER1 antisense RNA 1 (head to head)                                             | 2        |
|     |                 | C7orf69      | chromosome 7 open reading frame 69                                               | 2        |
|     |                 | LRRC17       | leucine rich repeat containing 17                                                | 2        |
|     |                 | RNA5SP255    | RNA, 5S ribosomal pseudogene 255                                                 | 2        |
|     |                 | RP11-111F5.3 | putative novel transcript                                                        | 2        |
|     |                 | MIR3152      | microRNA 3152                                                                    | 2        |
|     |                 | RNU4ATAC5P   | RNA, U4atac small nuclear 5, pseudogene                                          | 2        |
|     |                 | MIR548B      | microRNA 548b                                                                    | 2        |
|     |                 | RNA5SP222    | RNA, 5S ribosomal pseudogene 222                                                 | 2        |
|     |                 | LOC101927468 | uncharacterized LOC101927468                                                     | 2        |
|     |                 | RNU6-1286P   | RNA, U6 small nuclear 1286, pseudogene                                           | 2        |
|     |                 | LINC01003    | long intergenic non-protein coding RNA 1003                                      | 2        |
|     |                 | SNORD32A     | small nucleolar RNA, C/D box 32A                                                 | 2        |
|     |                 | RNU6-206P    | RNA, U6 small nuclear 206, pseudogene                                            | 2        |
|     |                 | IGIP         | IgA-inducing protein                                                             | 2        |
|     |                 | MAMDC2       | MAM domain containing 2                                                          | 2        |
|     |                 | RIMBP3B      | RIMS binding protein 3B                                                          | 2        |
|     |                 | RNA5SP347    | RNA, 5S ribosomal pseudogene 347                                                 | 2        |
|     |                 | UGCG         | UDP-glucose ceramide glucosyltransferase                                         | 2        |
|     |                 | ERICH2       | glutamate-rich 2                                                                 | 2        |
|     |                 | MXD1         | MAX dimerization protein 1                                                       | 2        |
|     |                 | TCERG1L-AS1  | TCERG1L antisense RNA 1                                                          | 2        |
|     |                 | AFF1         | AF4/FMR2 family, member 1                                                        | 2        |
|     |                 | KIAA1377     | KIAA1377                                                                         | 2        |
|     |                 | PTGER3       | prostaglandin E receptor 3 (subtype EP3)                                         | 2        |
|     |                 | LOC102724763 | uncharacterized LOC102724763                                                     | 2        |
|     |                 | RNU6-478P    | RNA, U6 small nuclear 478, pseudogene                                            | 2        |
|     |                 | WFIKKN1      | WAP, follistatin/kazal, immunoglobulin, kunitz and netrin domain containing 1    | 2        |
|     |                 | TGIF2LY      | TGFB-induced factor homeobox 2-like, Y-linked                                    | 2        |
|     |                 | C12orf55     | chromosome 12 open reading frame 55                                              | 2        |
|     |                 | FIRRE        | firre intergenic repeating RNA element                                           | 2        |
|     |                 | LINC00202-2  | long intergenic non-protein coding RNA 202-2                                     | 2        |
|     |                 | PPM1N        | protein phosphatase, Mg <sup>2+</sup> /Mn <sup>2+</sup> dependent, 1N (putative) | 2        |
|     |                 | RP11-408J6.1 | novel transcript, intronic to SEMA6D                                             | 2        |
|     |                 | NRG4         | neuregulin 4                                                                     | 2        |
|     |                 | RNA5SP90     | RNA, 5S ribosomal pseudogene 90                                                  | 2        |
|     |                 | RNU4-80P     | RNA, U4 small nuclear 80, pseudogene                                             | 2        |
|     |                 | LOC100506746 | uncharacterized LOC100506746                                                     | 2        |
|     |                 | SNORD37      | small nucleolar RNA, C/D box 37                                                  | 2        |
|     |                 | CCDC18       | coiled-coil domain containing 18                                                 | -2       |
|     |                 | ESCO2        | establishment of sister chromatid cohesion N-acetyltransferase 2                 | -2       |
|     |                 | HIST1H4I     | histone cluster 1, H4i                                                           | -2       |
|     |                 | KRT17P2      | keratin 17 pseudogene 2                                                          | -2       |
|     |                 | MBOAT2       | membrane bound O-acyltransferase domain containing 2                             | -2       |
|     |                 | PTER         | phosphotriesterase related                                                       | -2       |
|     |                 | RP11-681L8.1 | novel transcript, sense overlapping to STPG2                                     | -2       |
|     |                 | TSPAN15      | tetraspanin 15                                                                   | -2       |
|     |                 | RP11-48B3.3  | novel transcript                                                                 | -2       |
|     |                 | AC097721.2   | novel transcript                                                                 | -2       |
|     |                 | ANXA8        | annexin A8                                                                       | -2       |

| sPE | 2 <sup>nd</sup> | Symbol        | Title                                                                                               | $\Delta$ |
|-----|-----------------|---------------|-----------------------------------------------------------------------------------------------------|----------|
|     |                 | ISYNA1        | inositol-3-phosphate synthase 1                                                                     | -2       |
|     |                 | MFSD12        | major facilitator superfamily domain containing 12                                                  | -2       |
|     |                 | NEDD4L        | neural precursor cell expressed, developmentally down-regulated 4-like, E3 ubiquitin protein ligase | -2       |
|     |                 | SEPT6         | septin 6                                                                                            | -2       |
|     |                 | SPNS2         | spinster homolog 2 (Drosophila)                                                                     | -2       |
|     |                 | CHEK1         | checkpoint kinase 1                                                                                 | -2       |
|     |                 | RAB11FIP1     | RAB11 family interacting protein 1 (class I)                                                        | -2       |
|     |                 | SIX4          | SIX homeobox 4                                                                                      | -2       |
|     |                 | SPINT1        | serine peptidase inhibitor, Kunitz type 1                                                           | -2       |
|     |                 | TIMM50        | translocase of inner mitochondrial membrane 50 homolog (S. cerevisiae)                              | -2       |
|     |                 | SLC38A9       | solute carrier family 38, member 9                                                                  | -2       |
|     |                 | ATP6V0A4      | ATPase, H <sup>+</sup> transporting, lysosomal V0 subunit a4                                        | -2       |
|     |                 | TMEM52B       | transmembrane protein 52B                                                                           | -2       |
|     |                 | COL4A5        | collagen, type IV, alpha 5                                                                          | -2       |
|     |                 | ERVH48-1      | endogenous retrovirus group 48, member 1                                                            | -2       |
|     |                 | MIR301A       | microRNA 301a                                                                                       | -2       |
|     |                 | MT-TT         | mitochondrially encoded tRNA threonine                                                              | -2       |
|     |                 | GREB1L        | growth regulation by estrogen in breast cancer-like                                                 | -2       |
|     |                 | BLNK          | B-cell linker                                                                                       | -2       |
|     |                 | HCP5          | HLA complex P5 (non-protein coding)                                                                 | -2       |
|     |                 | LOC100288637  | OTU deubiquitinase 7A pseudogene                                                                    | -2       |
|     |                 | TGFB1         | transforming growth factor, beta 1                                                                  | -2       |
|     |                 | TPTE2         | transmembrane phosphoinositide 3-phosphatase and tensin homolog 2                                   | -2       |
|     |                 | TTC7B         | tetratricopeptide repeat domain 7B                                                                  | -2       |
|     |                 | INTS6         | integrator complex subunit 6                                                                        | -2       |
|     |                 | MIR1-2        | microRNA 1-2                                                                                        | -2       |
|     |                 | RP2           | retinitis pigmentosa 2 (X-linked recessive)                                                         | -2       |
|     |                 | SNORD10       | small nucleolar RNA, C/D box 10                                                                     | -2       |
|     |                 | WNT6          | wingless-type MMTV integration site family, member 6                                                | -2       |
|     |                 | RNU6-208P     | RNA, U6 small nuclear 208, pseudogene                                                               | -2       |
|     |                 | RNU6-879P     | RNA, U6 small nuclear 879, pseudogene                                                               | -2       |
|     |                 | AC093375.1    | novel transcript                                                                                    | -2       |
|     |                 | ITGB6         | integrin, beta 6                                                                                    | -2       |
|     |                 | LOC102725166  | uncharacterized LOC102725166                                                                        | -2       |
|     |                 | MYBL2         | v-myb avian myeloblastosis viral oncogene homolog-like 2                                            | -2       |
|     |                 | RNU6-1340P    | RNA, U6 small nuclear 1340, pseudogene                                                              | -2       |
|     |                 | RP11-576N17.5 | putative novel transcript                                                                           | -2       |
|     |                 | SH2D4A        | SH2 domain containing 4A                                                                            | -2       |
|     |                 | SNORD50A      | small nucleolar RNA, C/D box 50A                                                                    | -2       |
|     |                 | ARL15         | ADP-ribosylation factor-like 15                                                                     | -2       |
|     |                 | PARP8         | poly (ADP-ribose) polymerase family, member 8                                                       | -2       |
|     |                 | PLK1          | polo-like kinase 1                                                                                  | -2       |
|     |                 | SLC15A2       | solute carrier family 15 (oligopeptide transporter), member 2                                       | -2       |
|     |                 | SLC22A11      | solute carrier family 22 (organic anion/urate transporter), member 11                               | -2       |
|     |                 | DNMT1         | DNA (cytosine-5-)-methyltransferase 1                                                               | -2       |
|     |                 | C5orf30       | chromosome 5 open reading frame 30                                                                  | -2       |
|     |                 | HAND1         | heart and neural crest derivatives expressed 1                                                      | -2       |
|     |                 | LAMC2         | laminin, gamma 2                                                                                    | -2       |
|     |                 | SIRPB2        | signal-regulatory protein beta 2                                                                    | -2       |
|     |                 | METTL7A       | methyltransferase like 7A                                                                           | -2       |

| sPE | 2 <sup>nd</sup> | Symbol       | Title                                                                | $\Delta$ |
|-----|-----------------|--------------|----------------------------------------------------------------------|----------|
|     |                 | MIR619       | microRNA 619                                                         | -2       |
|     |                 | SLC6A4       | solute carrier family 6 (neurotransmitter transporter), member 4     | -2       |
|     |                 | AC011558.5   | novel transcript, antisense to CNN2                                  | -2       |
|     |                 | AIM2         | absent in melanoma 2                                                 | -2       |
|     |                 | CHI3L1       | chitinase 3-like 1 (cartilage glycoprotein-39)                       | -2       |
|     |                 | HCST         | hematopoietic cell signal transducer                                 | -2       |
|     |                 | KIAA1217     | KIAA1217                                                             | -2       |
|     |                 | LOC101928076 | uncharacterized LOC101928076                                         | -2       |
|     |                 | MAN1A1       | mannosidase, alpha, class 1A, member 1                               | -2       |
|     |                 | MIR3916      | microRNA 3916                                                        | -2       |
|     |                 | GINS1        | GINS complex subunit 1 (Psf1 homolog)                                | -2       |
|     |                 | C6orf226     | chromosome 6 open reading frame 226                                  | -2       |
|     |                 | HJURP        | Holliday junction recognition protein                                | -2       |
|     |                 | KIF4A        | kinesin family member 4A                                             | -2       |
|     |                 | LYPD3        | LY6/PLAUR domain containing 3                                        | -2       |
|     |                 | SIGLEC14     | sialic acid binding Ig-like lectin 14                                | -2       |
|     |                 | FERMT1       | fermitin family member 1                                             | -2       |
|     |                 | ANKRD10-IT1  | ANKRD10 intronic transcript 1 (non-protein coding)                   | -2       |
|     |                 | ITM2A        | integral membrane protein 2A                                         | -2       |
|     |                 | KIF13B       | kinesin family member 13B                                            | -2       |
|     |                 | RASGRP3      | RAS guanyl releasing protein 3 (calcium and DAG-regulated)           | -2       |
|     |                 | SMS          | spermine synthase                                                    | -2       |
|     |                 | GBP1P1       | guanylate binding protein 1, interferon-inducible pseudogene 1       | -2       |
|     |                 | FFAR3        | free fatty acid receptor 3                                           | -2       |
|     |                 | GAS2L3       | growth arrest-specific 2 like 3                                      | -2       |
|     |                 | SORT1        | sortilin 1                                                           | -2       |
|     |                 | ZNF66        | zinc finger protein 66                                               | -2       |
|     |                 | IRF1         | interferon regulatory factor 1                                       | -2       |
|     |                 | GEN1         | GEN1 Holliday junction 5 flap endonuclease                           | -2       |
|     |                 | SPRY2        | sprouty homolog 2 (Drosophila)                                       | -2       |
|     |                 | FEZ1         | fasciculation and elongation protein zeta 1 (zygin I)                | -2       |
|     |                 | MND1         | meiotic nuclear divisions 1 homolog (S. cerevisiae)                  | -2       |
|     |                 | ENAH         | enabled homolog (Drosophila)                                         | -2       |
|     |                 | RNU6-572P    | RNA, U6 small nuclear 572, pseudogene                                | -2       |
|     |                 | TMEM194B     | transmembrane protein 194B                                           | -2       |
|     |                 | C5orf34      | chromosome 5 open reading frame 34                                   | -2       |
|     |                 | RP11-64D22.5 | novel transcript                                                     | -2       |
|     |                 | CDH2         | cadherin 2, type 1, N-cadherin (neuronal)                            | -2       |
|     |                 | GUCY1A3      | guanylate cyclase 1, soluble, alpha 3                                | -2       |
|     |                 | INTS4L1      | integrator complex subunit 4-like 1                                  | -2       |
|     |                 | CDCA8        | cell division cycle associated 8                                     | -2       |
|     |                 | DUSP10       | dual specificity phosphatase 10                                      | -2       |
|     |                 | RP5-1087E8.3 | putative novel transcript                                            | -2       |
|     |                 | TPM4         | tropomyosin 4                                                        | -2       |
|     |                 | GNG5P2       | guanine nucleotide binding protein (G protein), gamma 5 pseudogene 2 | -2       |
|     |                 | GBP3         | guanylate binding protein 3                                          | -2       |
|     |                 | PCDH10       | protocadherin 10                                                     | -2       |
|     |                 | GPR115       | G protein-coupled receptor 115                                       | -2       |
|     |                 | BCAT1        | branched chain amino-acid transaminase 1, cytosolic                  | -2       |
|     |                 | ZNF431       | zinc finger protein 431                                              | -2       |

| sPE | 2 <sup>nd</sup> | Symbol        | Title                                                             | $\Delta$ |
|-----|-----------------|---------------|-------------------------------------------------------------------|----------|
|     |                 | DTWD2         | DTW domain containing 2                                           | -2       |
|     |                 | CENPU         | centromere protein U                                              | -2       |
|     |                 | ANXA3         | annexin A3                                                        | -2       |
|     |                 | SPC25         | SPC25, NDC80 kinetochore complex component                        | -2       |
|     |                 | GGH           | gamma-glutamyl hydrolase (conjugase, folylpolyglutamyl hydrolase) | -2       |
|     |                 | ITGA6         | integrin, alpha 6                                                 | -2       |
|     |                 | RP11-184E9.1  | novel transcript                                                  | -2       |
|     |                 | CAPN6         | calpain 6                                                         | -2       |
|     |                 | KPNA2         | karyopherin alpha 2 (RAG cohort 1, importin alpha 1)              | -2       |
|     |                 | RFC3          | replication factor C (activator 1) 3, 38kDa                       | -2       |
|     |                 | SH3RF2        | SH3 domain containing ring finger 2                               | -2       |
|     |                 | RMI2          | RecQ mediated genome instability 2                                | -2       |
|     |                 | IL32          | interleukin 32                                                    | -2       |
|     |                 | RNU6-583P     | RNA, U6 small nuclear 583, pseudogene                             | -2       |
|     |                 | RP11-108P20.4 | novel transcript                                                  | -2       |
|     |                 | NUAK2         | NUAK family, SNF1-like kinase, 2                                  | -2       |
|     |                 | RNU6-1316P    | RNA, U6 small nuclear 1316, pseudogene                            | -2       |
|     |                 | RNA5SP82      | RNA, 5S ribosomal pseudogene 82                                   | -2       |
|     |                 | TNF           | tumor necrosis factor                                             | -2       |
|     |                 | LOC101929579  | uncharacterized LOC101929579                                      | -2       |
|     |                 | ASF1B         | anti-silencing function 1B histone chaperone                      | -2       |
|     |                 | CNN3          | calponin 3, acidic                                                | -2       |
|     |                 | CYP2D6        | cytochrome P450, family 2, subfamily D, polypeptide 6             | -2       |
|     |                 | SPOPL         | speckle-type POZ protein-like                                     | -2       |
|     |                 | POT1-AS1      | POT1 antisense RNA 1                                              | -2       |
|     |                 | GEMIN2        | gem (nuclear organelle) associated protein 2                      | -2       |
|     |                 | REEP4         | receptor accessory protein 4                                      | -2       |
|     |                 | TRANK1        | tetratricopeptide repeat and ankyrin repeat containing 1          | -2       |
|     |                 | ICAM1         | intercellular adhesion molecule 1                                 | -2       |
|     |                 | LINC01036     | long intergenic non-protein coding RNA 1036                       | -2       |
|     |                 | LOC101927841  | uncharacterized LOC101927841                                      | -2       |
|     |                 | ARHGAP11B     | Rho GTPase activating protein 11B                                 | -2       |
|     |                 | HCAR3         | hydroxycarboxylic acid receptor 3                                 | -2       |
|     |                 | SNAR-D        | small ILF3/NF90-associated RNA D                                  | -2       |
|     |                 | ECT2          | epithelial cell transforming 2                                    | -2       |
|     |                 | SPATA18       | spermatogenesis associated 18                                     | -2       |
|     |                 | ZNF554        | zinc finger protein 554                                           | -2       |
|     |                 | GLDC          | glycine dehydrogenase (decarboxylating)                           | -2       |
|     |                 | SCCPDH        | saccharopine dehydrogenase (putative)                             | -2       |
|     |                 | RNF128        | ring finger protein 128, E3 ubiquitin protein ligase              | -2       |
|     |                 | SLC44A3       | solute carrier family 44, member 3                                | -2       |
|     |                 | DTL           | denticleless E3 ubiquitin protein ligase homolog (Drosophila)     | -2       |
|     |                 | RNU6-801P     | RNA, U6 small nuclear 801, pseudogene                             | -2       |
|     |                 | CXCL2         | chemokine (C-X-C motif) ligand 2                                  | -2       |
|     |                 | ARHGAP23P1    | Rho GTPase activating protein 23 pseudogene 1                     | -2       |
|     |                 | RP11-203H2.2  | novel transcript                                                  | -2       |
|     |                 | MIR521-1      | microRNA 521-1                                                    | -2       |
|     |                 | MIR3671       | microRNA 3671                                                     | -2       |
|     |                 | MKI67         | marker of proliferation Ki-67                                     | -2       |
|     |                 | RPS3A         | ribosomal protein S3A                                             | -2       |



| sPE | 2 <sup>nd</sup> | Symbol        | Title                                                               | $\Delta$ |
|-----|-----------------|---------------|---------------------------------------------------------------------|----------|
|     |                 | TK1           | thymidine kinase 1, soluble                                         | -2       |
|     |                 | KRT16P4       | keratin 16 pseudogene 4                                             | -2       |
|     |                 | LOC101927260  | uncharacterized LOC101927260                                        | -2       |
|     |                 | RP11-1166P10  | Rho GTPase activating protein 23 (ARHGAP23) pseudogene              | -2       |
|     |                 | KIF15         | kinesin family member 15                                            | -2       |
|     |                 | KIF23         | kinesin family member 23                                            | -2       |
|     |                 | STIL          | SCL/TAL1 interrupting locus                                         | -2       |
|     |                 | TTK           | TTK protein kinase                                                  | -2       |
|     |                 | COBL          | cordon-bleu WH2 repeat protein                                      | -3       |
|     |                 | HIST2H2BA     | histone cluster 2, H2ba (pseudogene)                                | -3       |
|     |                 | HMGA1         | high mobility group AT-hook 1                                       | -3       |
|     |                 | YBX3P1        | Y box binding protein 3 pseudogene 1                                | -3       |
|     |                 | FANCD2        | Fanconi anemia, complementation group D2                            | -3       |
|     |                 | TLR2          | toll-like receptor 2                                                | -3       |
|     |                 | CDH5          | cadherin 5, type 2 (vascular endothelium)                           | -3       |
|     |                 | GATSL2        | GATS protein-like 2                                                 | -3       |
|     |                 | FCGBP         | Fc fragment of IgG binding protein                                  | -3       |
|     |                 | RNU6-580P     | RNA, U6 small nuclear 580, pseudogene                               | -3       |
|     |                 | TMEM63A       | transmembrane protein 63A                                           | -3       |
|     |                 | MIR622        | microRNA 622                                                        | -3       |
|     |                 | TRDJ3         | T cell receptor delta joining 3                                     | -3       |
|     |                 | KIF20B        | kinesin family member 20B                                           | -3       |
|     |                 | FAM169A       | family with sequence similarity 169, member A                       | -3       |
|     |                 | BTG2          | BTG family, member 2                                                | -3       |
|     |                 | TPTE          | transmembrane phosphatase with tensin homology                      | -3       |
|     |                 | GBP1          | guanylate binding protein 1, interferon-inducible                   | -3       |
|     |                 | CLSPN         | claspin                                                             | -3       |
|     |                 | MIR103B2      | microRNA 103b-2                                                     | -3       |
|     |                 | RNU6-971P     | RNA, U6 small nuclear 971, pseudogene                               | -3       |
|     |                 | RNU6-151P     | RNA, U6 small nuclear 151, pseudogene                               | -3       |
|     |                 | ITGB4         | integrin, beta 4                                                    | -3       |
|     |                 | KRT17P1       | keratin 17 pseudogene 1                                             | -3       |
|     |                 | CDCP1         | CUB domain containing protein 1                                     | -3       |
|     |                 | PBK           | PDZ binding kinase                                                  | -3       |
|     |                 | KIAA0101      | KIAA0101                                                            | -3       |
|     |                 | TAGLN         | transgelin                                                          | -3       |
|     |                 | FOXO4         | forkhead box O4                                                     | -3       |
|     |                 | RNU6-850P     | RNA, U6 small nuclear 850, pseudogene                               | -3       |
|     |                 | RAD51         | RAD51 recombinase                                                   | -3       |
|     |                 | CDKN3         | cyclin-dependent kinase inhibitor 3                                 | -3       |
|     |                 | RP11-517O13.1 | novel transcript, antisense to TIMM9                                | -3       |
|     |                 | ATP6V1C2      | ATPase, H <sup>+</sup> transporting, lysosomal 42kDa, V1 subunit C2 | -3       |
|     |                 | CEP55         | centrosomal protein 55kDa                                           | -3       |
|     |                 | PRR11         | proline rich 11                                                     | -3       |
|     |                 | TP63          | tumor protein p63                                                   | -3       |
|     |                 | CD47          | CD47 molecule                                                       | -3       |
|     |                 | EFNB2         | ephrin-B2                                                           | -3       |
|     |                 | ARHGAP18      | Rho GTPase activating protein 18                                    | -3       |
|     |                 | PRC1          | protein regulator of cytokinesis 1                                  | -3       |
|     |                 | P2RY6         | pyrimidinergic receptor P2Y, G-protein coupled, 6                   | -3       |



| sPE | 2 <sup>nd</sup> | Symbol        | Title                                                                              | $\Delta$ |
|-----|-----------------|---------------|------------------------------------------------------------------------------------|----------|
|     |                 | CKAP2         | cytoskeleton associated protein 2                                                  | -3       |
|     |                 | CKS2          | CDC28 protein kinase regulatory subunit 2                                          | -3       |
|     |                 | KRAS          | Kirsten rat sarcoma viral oncogene homolog                                         | -3       |
|     |                 | RNA5SP282     | RNA, 5S ribosomal pseudogene 282                                                   | -3       |
|     |                 | CCDC81        | coiled-coil domain containing 81                                                   | -3       |
|     |                 | BLM           | Bloom syndrome, RecQ helicase-like                                                 | -3       |
|     |                 | CKAP2L        | cytoskeleton associated protein 2-like                                             | -3       |
|     |                 | HSD17B1       | hydroxysteroid (17-beta) dehydrogenase 1                                           | -3       |
|     |                 | ANKRD36BP2    | ankyrin repeat domain 36B pseudogene 2                                             | -3       |
|     |                 | KRT18P15      | keratin 18 pseudogene 15                                                           | -3       |
|     |                 | SGOL1         | shugoshin-like 1 (S. pombe)                                                        | -3       |
|     |                 | SNAR-C2       | small ILF3/NF90-associated RNA C2                                                  | -3       |
|     |                 | RNU6-226P     | RNA, U6 small nuclear 226, pseudogene                                              | -3       |
|     |                 | MIR15B        | microRNA 15b                                                                       | -3       |
|     |                 | LOC102724842  | uncharacterized LOC102724842                                                       | -3       |
|     |                 | AC078883.4    | novel transcript                                                                   | -3       |
|     |                 | RNU6-531P     | RNA, U6 small nuclear 531, pseudogene                                              | -3       |
|     |                 | RP11-49I4.3   | novel transcript                                                                   | -3       |
|     |                 | EXO1          | exonuclease 1                                                                      | -3       |
|     |                 | MIR520E       | microRNA 520e                                                                      | -3       |
|     |                 | KRT23         | keratin 23 (histone deacetylase inducible)                                         | -3       |
|     |                 | KDM4B         | lysine (K)-specific demethylase 4B                                                 | -3       |
|     |                 | COL15A1       | collagen, type XV, alpha 1                                                         | -3       |
|     |                 | RNA5SP330     | RNA, 5S ribosomal pseudogene 330                                                   | -3       |
|     |                 | RP11-524H19.2 | putative novel transcript                                                          | -3       |
|     |                 | LOC101927700  | uncharacterized LOC101927700                                                       | -3       |
|     |                 | AGL           | amylo-alpha-1, 6-glucosidase, 4-alpha-glucanotransferase                           | -3       |
|     |                 | CCL4          | chemokine (C-C motif) ligand 4                                                     | -3       |
|     |                 | RNU6-83P      | RNA, U6 small nuclear 83, pseudogene                                               | -3       |
|     |                 | CENPF         | centromere protein F, 350/400kDa                                                   | -3       |
|     |                 | SLC7A6        | solute carrier family 7 (amino acid transporter light chain, y+L system), member 6 | -3       |
|     |                 | MIR498        | microRNA 498                                                                       | -3       |
|     |                 | KRT18P49      | keratin 18 pseudogene 49                                                           | -3       |
|     |                 | SNORA53       | small nucleolar RNA, H/ACA box 53                                                  | -3       |
|     |                 | CDCA2         | cell division cycle associated 2                                                   | -3       |
|     |                 | GPR137B       | G protein-coupled receptor 137B                                                    | -3       |
|     |                 | LOC101927202  | uncharacterized LOC101927202                                                       | -3       |
|     |                 | MYH10         | myosin, heavy chain 10, non-muscle                                                 | -3       |
|     |                 | SMPDL3A       | sphingomyelin phosphodiesterase, acid-like 3A                                      | -3       |
|     |                 | SFN           | stratifin                                                                          | -3       |
|     |                 | NUF2          | NUF2, NDC80 kinetochore complex component                                          | -3       |
|     |                 | NRN1L         | neuritin 1-like                                                                    | -3       |
|     |                 | LAMB4         | laminin, beta 4                                                                    | -3       |
|     |                 | OCLN          | occludin                                                                           | -3       |
|     |                 | PLAU          | plasminogen activator, urokinase                                                   | -3       |
|     |                 | CACNG4        | calcium channel, voltage-dependent, gamma subunit 4                                | -3       |
|     |                 | MCM6          | minichromosome maintenance complex component 6                                     | -3       |
|     |                 | RNU7-43P      | RNA, U7 small nuclear 43 pseudogene                                                | -3       |
|     |                 | PGAP1         | post-GPI attachment to proteins 1                                                  | -3       |
|     |                 | AGR2          | anterior gradient 2                                                                | -3       |

| sPE | 2 <sup>nd</sup> | Symbol      | Title                                                                            | $\Delta$ |
|-----|-----------------|-------------|----------------------------------------------------------------------------------|----------|
|     |                 | LBR         | lamin B receptor                                                                 | -3       |
|     |                 | KRT18P54    | keratin 18 pseudogene 54                                                         | -3       |
|     |                 | CSF3R       | colony stimulating factor 3 receptor (granulocyte)                               | -3       |
|     |                 | KIAA1524    | KIAA1524                                                                         | -3       |
|     |                 | RRM2        | ribonucleotide reductase M2                                                      | -3       |
|     |                 | HNRNPA1P33  | heterogeneous nuclear ribonucleoprotein A1 pseudogene 33                         | -3       |
|     |                 | RBMS3       | RNA binding motif, single stranded interacting protein 3                         | -3       |
|     |                 | PLK4        | polo-like kinase 4                                                               | -3       |
|     |                 | MIR548AL    | microRNA 548al                                                                   | -3       |
|     |                 | ORC6        | origin recognition complex, subunit 6                                            | -3       |
|     |                 | RNU6-780P   | RNA, U6 small nuclear 780, pseudogene                                            | -3       |
|     |                 | CASC5       | cancer susceptibility candidate 5                                                | -3       |
|     |                 | BIRC5       | baculoviral IAP repeat containing 5                                              | -3       |
|     |                 | LMNB1       | lamin B1                                                                         | -3       |
|     |                 | RNU6-803P   | RNA, U6 small nuclear 803, pseudogene                                            | -3       |
|     |                 | RN7SKP42    | RNA, 7SK small nuclear pseudogene 42                                             | -3       |
|     |                 | FGFR2       | fibroblast growth factor receptor 2                                              | -3       |
|     |                 | ZDHHC2      | zinc finger, DHHC-type containing 2                                              | -3       |
|     |                 | KRT18P10    | keratin 18 pseudogene 10                                                         | -3       |
|     |                 | RNU6-560P   | RNA, U6 small nuclear 560, pseudogene                                            | -3       |
|     |                 | CENPK       | centromere protein K                                                             | -3       |
|     |                 | AFAP1L2     | actin filament associated protein 1-like 2                                       | -3       |
|     |                 | SNORD35A    | small nucleolar RNA, C/D box 35A                                                 | -3       |
|     |                 | NLRP2       | NLR family, pyrin domain containing 2                                            | -3       |
|     |                 | SLC43A2     | solute carrier family 43 (amino acid system L transporter), member 2             | -3       |
|     |                 | NLRP7       | NLR family, pyrin domain containing 7                                            | -3       |
|     |                 | RNA5SP474   | RNA, 5S ribosomal pseudogene 474                                                 | -3       |
|     |                 | TMC7        | transmembrane channel-like 7                                                     | -3       |
|     |                 | TPX2        | TPX2, microtubule-associated                                                     | -3       |
|     |                 | AREG        | amphiregulin                                                                     | -3       |
|     |                 | CCNA2       | cyclin A2                                                                        | -3       |
|     |                 | CCNB2       | cyclin B2                                                                        | -3       |
|     |                 | EPCAM       | epithelial cell adhesion molecule                                                | -3       |
|     |                 | CENPH       | centromere protein H                                                             | -3       |
|     |                 | CLU         | clusterin                                                                        | -3       |
|     |                 | DRAM1       | DNA-damage regulated autophagy modulator 1                                       | -3       |
|     |                 | GPR82       | G protein-coupled receptor 82                                                    | -3       |
|     |                 | SLC7A5      | solute carrier family 7 (amino acid transporter light chain, L system), member 5 | -3       |
|     |                 | HELLS       | helicase, lymphoid-specific                                                      | -3       |
|     |                 | CST6        | cystatin E/M                                                                     | -3       |
|     |                 | RP11-1M18.1 | novel transcript                                                                 | -3       |
|     |                 | KIF11       | kinesin family member 11                                                         | -3       |
|     |                 | HAPLN1      | hyaluronan and proteoglycan link protein 1                                       | -3       |
|     |                 | MEST        | mesoderm specific transcript                                                     | -3       |
|     |                 | RNU6-308P   | RNA, U6 small nuclear 308, pseudogene                                            | -3       |
|     |                 | PLS1        | plastin 1                                                                        | -3       |
|     |                 | CCNB1       | cyclin B1                                                                        | -4       |
|     |                 | PVRL2       | poliovirus receptor-related 2 (herpesvirus entry mediator B)                     | -4       |
|     |                 | GPR37       | G protein-coupled receptor 37 (endothelin receptor type B-like)                  | -4       |
|     |                 | SNORD16     | small nucleolar RNA, C/D box 16                                                  | -4       |

| sPE | 2 <sup>nd</sup> | Symbol       | Title                                                     | $\Delta$ |
|-----|-----------------|--------------|-----------------------------------------------------------|----------|
|     |                 | XAGE3        | X antigen family, member 3                                | -4       |
|     |                 | TOP2A        | topoisomerase (DNA) II alpha 170kDa                       | -4       |
|     |                 | CD274        | CD274 molecule                                            | -4       |
|     |                 | RNU6-79P     | RNA, U6 small nuclear 79, pseudogene                      | -4       |
|     |                 | FAR2P2       | fatty acyl CoA reductase 2 pseudogene 2                   | -4       |
|     |                 | RAD51AP1     | RAD51 associated protein 1                                | -4       |
|     |                 | TINAGL1      | tubulointerstitial nephritis antigen-like 1               | -4       |
|     |                 | COL1A2       | collagen, type I, alpha 2                                 | -4       |
|     |                 | DIAPH3       | diaphanous-related formin 3                               | -4       |
|     |                 | OLR1         | oxidized low density lipoprotein (lectin-like) receptor 1 | -4       |
|     |                 | DDAH1        | dimethylarginine dimethylaminohydrolase 1                 | -4       |
|     |                 | HSD17B2      | hydroxysteroid (17-beta) dehydrogenase 2                  | -4       |
|     |                 | MIR7641-2    | microRNA 7641-2                                           | -4       |
|     |                 | DSCC1        | DNA replication and sister chromatid cohesion 1           | -4       |
|     |                 | COL3A1       | collagen, type III, alpha 1                               | -4       |
|     |                 | RNU6-223P    | RNA, U6 small nuclear 223, pseudogene                     | -4       |
|     |                 | TP53INP1     | tumor protein p53 inducible nuclear protein 1             | -4       |
|     |                 | AC106053.1   | novel transcript                                          | -4       |
|     |                 | SERPINF1     | serpin peptidase inhibitor, clade F1                      | -4       |
|     |                 | RNU6-623P    | RNA, U6 small nuclear 623, pseudogene                     | -4       |
|     |                 | BUB1         | BUB1 mitotic checkpoint serine/threonine kinase           | -4       |
|     |                 | KIF14        | kinesin family member 14                                  | -4       |
|     |                 | PDIA6        | protein disulfide isomerase family A, member 6            | -4       |
|     |                 | RNU6-387P    | RNA, U6 small nuclear 387, pseudogene                     | -4       |
|     |                 | TYMS         | thymidylate synthetase                                    | -4       |
|     |                 | RNU6-1195P   | RNA, U6 small nuclear 1195, pseudogene                    | -4       |
|     |                 | ARHGAP11A    | Rho GTPase activating protein 11A                         | -4       |
|     |                 | DLGAP5       | discs, large (Drosophila) homolog-associated protein 5    | -4       |
|     |                 | CTD-2306M5.1 | novel transcript                                          | -4       |
|     |                 | MIR218-1     | microRNA 218-1                                            | -4       |
|     |                 | SHCBP1       | SHC SH2-domain binding protein 1                          | -4       |
|     |                 | CENPE        | centromere protein E, 312kDa                              | -4       |
|     |                 | HIST1H3E     | histone cluster 1, H3e                                    | -4       |
|     |                 | C10orf55     | chromosome 10 open reading frame 55                       | -4       |
|     |                 | MELK         | maternal embryonic leucine zipper kinase                  | -4       |
|     |                 | SNORD75      | small nucleolar RNA, C/D box 75                           | -4       |
|     |                 | FMOD         | fibromodulin                                              | -4       |
|     |                 | RNU6-736P    | RNA, U6 small nuclear 736, pseudogene                     | -4       |
|     |                 | PABPC4L      | poly(A) binding protein, cytoplasmic 4-like               | -4       |
|     |                 | LINC01237    | long intergenic non-protein coding RNA 1237               | -4       |
|     |                 | RNU6-606P    | RNA, U6 small nuclear 606, pseudogene                     | -4       |
|     |                 | GBP2         | guanylate binding protein 2, interferon-inducible         | -4       |
|     |                 | AP001615.9   | putative novel transcript                                 | -4       |
|     |                 | CDC6         | cell division cycle 6                                     | -4       |
|     |                 | SKA3         | spindle and kinetochore associated complex subunit 3      | -4       |
|     |                 | NCAPG        | non-SMC condensin I complex, subunit G                    | -4       |
|     |                 | EPPK1        | epiplakin 1                                               | -4       |
|     |                 | TSPAN2       | tetraspanin 2                                             | -4       |
|     |                 | RNU6-375P    | RNA, U6 small nuclear 375, pseudogene                     | -4       |
|     |                 | SNORD2       | small nucleolar RNA, C/D box 2                            | -4       |

| sPE | 2 <sup>nd</sup> | Symbol      | Title                                                                | $\Delta$ |
|-----|-----------------|-------------|----------------------------------------------------------------------|----------|
|     |                 | RNU6-1318P  | RNA, U6 small nuclear 1318, pseudogene                               | -5       |
|     |                 | ASPM        | asp (abnormal spindle) homolog, microcephaly associated (Drosophila) | -5       |
|     |                 | CDK1        | cyclin-dependent kinase 1                                            | -5       |
|     |                 | SIGLEC6     | sialic acid binding Ig-like lectin 6                                 | -5       |
|     |                 | VIT         | vitrin                                                               | -5       |
|     |                 | RNU6-1170P  | RNA, U6 small nuclear 1170, pseudogene                               | -5       |
|     |                 | AIM1        | absent in melanoma 1                                                 | -5       |
|     |                 | NUSAP1      | nucleolar and spindle associated protein 1                           | -5       |
|     |                 | RNU6-1188P  | RNA, U6 small nuclear 1188, pseudogene                               | -5       |
|     |                 | RNA5SP88    | RNA, 5S ribosomal pseudogene 88                                      | -5       |
|     |                 | PMAIP1      | phorbol-12-myristate-13-acetate-induced protein 1                    | -5       |
|     |                 | NRK         | Nik related kinase                                                   | -5       |
|     |                 | BRIP1       | BRCA1 interacting protein C-terminal helicase 1                      | -5       |
|     |                 | PAGE4       | P antigen family, member 4 (prostate associated)                     | -5       |
|     |                 | RP4-694A7.2 | putative novel transcript                                            | -5       |
|     |                 | HMMR        | hyaluronan-mediated motility receptor (RHAMM)                        | -5       |
|     |                 | KIF18A      | kinesin family member 18A                                            | -5       |
|     |                 | NDC80       | NDC80 kinetochore complex component                                  | -5       |
|     |                 | DEPDC1      | DEP domain containing 1                                              | -5       |
|     |                 | RNU4-54P    | RNA, U4 small nuclear 54, pseudogene                                 | -5       |
|     |                 | KRT17       | keratin 17                                                           | -5       |
|     |                 | HIST1H3B    | histone cluster 1, H3b                                               | -5       |
|     |                 | HGF         | hepatocyte growth factor (hepapoietin A; scatter factor)             | -6       |
|     |                 | SUCNR1      | succinate receptor 1                                                 | -6       |
|     |                 | SNORD111    | small nucleolar RNA, C/D box 111                                     | -6       |
|     |                 | HIST1H3F    | histone cluster 1, H3f                                               | -6       |
|     |                 | HIST1H3I    | histone cluster 1, H3i                                               | -6       |
|     |                 | CLDN6       | claudin 6                                                            | -6       |
|     |                 | LRP2        | low density lipoprotein receptor-related protein 2                   | -6       |
|     |                 | MIR205HG    | MIR205 host gene (non-protein coding)                                | -6       |
|     |                 | CCL2        | chemokine (C-C motif) ligand 2                                       | -6       |
|     |                 | CXCL10      | chemokine (C-X-C motif) ligand 10                                    | -6       |
|     |                 | MIR1323     | microRNA 1323                                                        | -6       |
|     |                 | PRSS12      | protease, serine, 12 (neurotrypsin, motopsin)                        | -6       |
|     |                 | LPHN3       | latrophilin 3                                                        | -6       |
|     |                 | F5          | coagulation factor V (proaccelerin, labile factor)                   | -7       |
|     |                 | EGFL6       | EGF-like-domain, multiple 6                                          | -7       |
|     |                 | CDO1        | cysteine dioxygenase type 1                                          | -7       |
|     |                 | ITGA2       | integrin, alpha 2 (CD49B, alpha 2 subunit of VLA-2 receptor)         | -8       |
|     |                 | RNU6-1330P  | RNA, U6 small nuclear 1330, pseudogene                               | -8       |
|     |                 | CD24        | CD24 molecule                                                        | -10      |
|     |                 | HIST1H2AM   | histone cluster 1, H2am                                              | -10      |
|     |                 | NPPB        | natriuretic peptide B                                                | -11      |
|     |                 | MIR515-1    | microRNA 515-1                                                       | -26      |

RMA Intensity  
0 (log2) 12

**Supplemental Figure 4.** Global gene expression profiles of schCTBs isolated by laser capture microdissection from the fetal membranes: severe preeclampsia (sPE) as compared to the late second trimester of normal pregnancy (2<sup>nd</sup>) (n=4/group). The heatmap lists genes that were differentially expressed by 2-fold or greater.

| nPTB | 2 <sup>nd</sup> | Symbol        | Title                                                                               | $\Delta$ |
|------|-----------------|---------------|-------------------------------------------------------------------------------------|----------|
|      |                 | SPINK1        | serine peptidase inhibitor, Kazal type 1                                            | 12       |
|      |                 | HLA-DRB1      | major histocompatibility complex, class II, DR beta 1                               | 12       |
|      |                 | RNU6-1154P    | RNA, U6 small nuclear 1154, pseudogene                                              | 10       |
|      |                 | RNU6-638P     | RNA, U6 small nuclear 638, pseudogene                                               | 7        |
|      |                 | BMP2          | bone morphogenetic protein 2                                                        | 7        |
|      |                 | KLHL22-IT1    | KLHL22 intronic transcript 1 (non-protein coding)                                   | 6        |
|      |                 | HK2           | hexokinase 2                                                                        | 5        |
|      |                 | LRRC15        | leucine rich repeat containing 15                                                   | 5        |
|      |                 | RNU1-124P     | RNA, U1 small nuclear 124, pseudogene                                               | 5        |
|      |                 | PPP1R3C       | protein phosphatase 1, regulatory subunit 3C                                        | 5        |
|      |                 | MIR302A       | microRNA 302a                                                                       | 5        |
|      |                 | RP11-407H12.8 | novel transcript                                                                    | 4        |
|      |                 | SNORA29       | small nucleolar RNA, H/ACA box 29                                                   | 4        |
|      |                 | RNU6-540P     | RNA, U6 small nuclear 540, pseudogene                                               | 4        |
|      |                 | RNU6-1014P    | RNA, U6 small nuclear 1014, pseudogene                                              | 4        |
|      |                 | RNU5F-4P      | RNA, U5F small nuclear 4, pseudogene                                                | 4        |
|      |                 | SNORD59A      | small nucleolar RNA, C/D box 59A                                                    | 4        |
|      |                 | SCEL          | sciellin                                                                            | 4        |
|      |                 | ATP13A4       | ATPase type 13A4                                                                    | 3        |
|      |                 | AC008269.2    | putative novel transcript                                                           | 3        |
|      |                 | CES1          | carboxylesterase 1                                                                  | 3        |
|      |                 | GJB3          | gap junction protein, beta 3, 31kDa                                                 | 3        |
|      |                 | LOC101928461  | uncharacterized LOC101928461                                                        | 3        |
|      |                 | DDIT4         | DNA-damage-inducible transcript 4                                                   | 3        |
|      |                 | RP11-48B3.5   | novel transcript, antisense to ZBTB10                                               | 3        |
|      |                 | RP11-138H8.2  | novel transcript                                                                    | 3        |
|      |                 | HRASLS2       | HRAS-like suppressor 2                                                              | 3        |
|      |                 | SNORD48       | small nucleolar RNA, C/D box 48                                                     | 3        |
|      |                 | FCGR1C        | Fc fragment of IgG, high affinity I <sub>c</sub> receptor (CD64), pseudogene        | 3        |
|      |                 | SNORD68       | small nucleolar RNA, C/D box 68                                                     | 3        |
|      |                 | MIR1204       | microRNA 1204                                                                       | 3        |
|      |                 | SERPINA3      | serpin peptidase inhibitor, clade A (alpha-1 antiproteinase, antitrypsin), member 3 | 3        |
|      |                 | RNU7-9P       | RNA, U7 small nuclear 9 pseudogene                                                  | 3        |
|      |                 | RNU4-21P      | RNA, U4 small nuclear 21, pseudogene                                                | 3        |
|      |                 | RNU6-249P     | RNA, U6 small nuclear 249, pseudogene                                               | 3        |
|      |                 | FAM86EP       | family with sequence similarity 86, member A pseudogene                             | 3        |
|      |                 | LINC00152     | long intergenic non-protein coding RNA 152 (LOC101930489 )                          | 3        |
|      |                 | SNORD33       | small nucleolar RNA, C/D box 33                                                     | 3        |
|      |                 | RNA5SP155     | RNA, 5S ribosomal pseudogene 155                                                    | 3        |
|      |                 | KLF9          | Kruppel-like factor 9                                                               | 3        |
|      |                 | RNU7-62P      | RNA, U7 small nuclear 62 pseudogene                                                 | 3        |
|      |                 | RNU4-76P      | RNA, U4 small nuclear 76, pseudogene                                                | 3        |
|      |                 | LOC101930489  | uncharacterized LOC101930489                                                        | 3        |
|      |                 | ADM           | adrenomedullin                                                                      | 3        |
|      |                 | GFPT2         | glutamine-fructose-6-phosphate transaminase 2                                       | 3        |
|      |                 | RP11-458D21.1 | novel transcript                                                                    | 3        |
|      |                 | MT1M          | metallothionein 1M                                                                  | 3        |
|      |                 | SNORD61       | small nucleolar RNA, C/D box 61                                                     | 3        |
|      |                 | GK-AS1        | GK antisense RNA 1                                                                  | 3        |
|      |                 | C15orf48      | chromosome 15 open reading frame 48                                                 | 3        |

| nPTB | 2 <sup>nd</sup> | Symbol        | Title                                                              | $\Delta$ |
|------|-----------------|---------------|--------------------------------------------------------------------|----------|
|      |                 | RNU7-80P      | RNA, U7 small nuclear 80 pseudogene                                | 3        |
|      |                 | IRS2          | insulin receptor substrate 2                                       | 3        |
|      |                 | RNA5SP468     | RNA, 5S ribosomal pseudogene 468                                   | 3        |
|      |                 | ZNF812        | zinc finger protein 812                                            | 2        |
|      |                 | OR10G7        | olfactory receptor, family 10, subfamily G, member 7               | 2        |
|      |                 | SV2B          | synaptic vesicle glycoprotein 2B                                   | 2        |
|      |                 | SRGAP2        | SLIT-ROBO Rho GTPase activating protein 2                          | 2        |
|      |                 | PER1          | period circadian clock 1                                           | 2        |
|      |                 | RNU7-26P      | RNA, U7 small nuclear 26 pseudogene                                | 2        |
|      |                 | RNU6-1230P    | RNA, U6 small nuclear 1230, pseudogene                             | 2        |
|      |                 | KRTAP6-2      | keratin associated protein 6-2                                     | 2        |
|      |                 | RNU7-51P      | RNA, U7 small nuclear 51 pseudogene                                | 2        |
|      |                 | RNU7-136P     | RNA, U7 small nuclear 136 pseudogene                               | 2        |
|      |                 | RSF1-IT1      | RSF1 intronic transcript 1 (non-protein coding)                    | 2        |
|      |                 | DUSP5         | dual specificity phosphatase 5                                     | 2        |
|      |                 | RP11-33I11.2  | putative novel transcript                                          | 2        |
|      |                 | MMP10         | matrix metalloproteinase 10 (stromelysin 2)                        | 2        |
|      |                 | RP11-10J5.1   | putative novel transcript                                          | 2        |
|      |                 | RP11-812E19.9 | novel gene similar to an immunoglobulin heavy variable 3/OR16 gene | 2        |
|      |                 | RNA5SP287     | RNA, 5S ribosomal pseudogene 287                                   | 2        |
|      |                 | RP11-38L15.2  | novel transcript                                                   | 2        |
|      |                 | RNA5SP255     | RNA, 5S ribosomal pseudogene 255                                   | 2        |
|      |                 | IL23A         | interleukin 23, alpha subunit p19                                  | 2        |
|      |                 | SNORA15       | small nucleolar RNA, H/ACA box 15                                  | 2        |
|      |                 | RP11-549L6.3  | putative novel transcript                                          | 2        |
|      |                 | CELSR3-AS1    | CELSR3 antisense RNA 1 (head to head)                              | 2        |
|      |                 | RNY3P8        | RNA, Ro-associated Y3 pseudogene 8                                 | 2        |
|      |                 | AC068491.2    | putative novel transcript                                          | 2        |
|      |                 | TRAJ14        | T cell receptor alpha joining 14                                   | 2        |
|      |                 | APOOP5        | apolipoprotein O pseudogene 5                                      | 2        |
|      |                 | IRF2BP2       | interferon regulatory factor 2 binding protein 2                   | 2        |
|      |                 | RN7SKP140     | RNA, 7SK small nuclear pseudogene 140                              | 2        |
|      |                 | CTD-2501M5.1  | novel transcript                                                   | 2        |
|      |                 | RP11-212I21.2 | novel transcript                                                   | 2        |
|      |                 | RNA5SP489     | RNA, 5S ribosomal pseudogene 489                                   | 2        |
|      |                 | MIR378F       | microRNA 378f                                                      | 2        |
|      |                 | RNA5SP185     | RNA, 5S ribosomal pseudogene 185                                   | 2        |
|      |                 | DLEU2L        | deleted in lymphocytic leukemia 2-like                             | 2        |
|      |                 | INTS4         | integrator complex subunit 4                                       | 2        |
|      |                 | LOC101927468  | uncharacterized LOC101927468                                       | 2        |
|      |                 | B3GALTL       | beta 1,3-galactosyltransferase-like                                | 2        |
|      |                 | MIR1537       | microRNA 1537                                                      | 2        |
|      |                 | CTB-4E7.1     | novel transcript                                                   | 2        |
|      |                 | GEM           | GTP binding protein overexpressed in skeletal muscle               | 2        |
|      |                 | MIR551A       | microRNA 551a                                                      | 2        |
|      |                 | RNU2-71P      | RNA, U2 small nuclear 71, pseudogene                               | 2        |
|      |                 | RN7SKP142     | RNA, 7SK small nuclear pseudogene 142                              | 2        |
|      |                 | RNA5SP460     | RNA, 5S ribosomal pseudogene 460                                   | 2        |
|      |                 | RNU4-41P      | RNA, U4 small nuclear 41, pseudogene                               | 2        |
|      |                 | RNU4ATAC10P   | RNA, U4atac small nuclear 10, pseudogene                           | 2        |



| nPTB | 2 <sup>nd</sup> | Symbol       | Title                                                           | $\Delta$ |
|------|-----------------|--------------|-----------------------------------------------------------------|----------|
|      |                 | VTRNA1-1     | vault RNA 1-1                                                   | 2        |
|      |                 | MIR365A      | microRNA 365a                                                   | 2        |
|      |                 | MIR4463      | microRNA 4463                                                   | 2        |
|      |                 | RNU7-59P     | RNA, U7 small nuclear 59 pseudogene                             | 2        |
|      |                 | RP11-400L8.2 | novel transcript                                                | 2        |
|      |                 | KIF15        | kinesin family member 15                                        | -2       |
|      |                 | HIST1H2BE    | histone cluster 1, H2be                                         | -2       |
|      |                 | LOC102723627 | uncharacterized LOC102723627                                    | -2       |
|      |                 | SLC40A1      | solute carrier family 40 (iron-regulated transporter), member 1 | -2       |
|      |                 | TIA1         | TIA1 cytotoxic granule-associated RNA binding protein           | -2       |
|      |                 | CPNE2        | copine II                                                       | -2       |
|      |                 | WDHD1        | WD repeat and HMG-box DNA binding protein 1                     | -2       |
|      |                 | FERMT1       | fermitin family member 1                                        | -2       |
|      |                 | SPC25        | SPC25, NDC80 kinetochore complex component                      | -2       |
|      |                 | PLK4         | polo-like kinase 4                                              | -2       |
|      |                 | KIAA1549     | KIAA1549                                                        | -2       |
|      |                 | LRRC28       | leucine rich repeat containing 28                               | -2       |
|      |                 | AP000704.5   | putative novel transcript                                       | -2       |
|      |                 | COLEC12      | collectin sub-family member 12                                  | -2       |
|      |                 | DNA2         | DNA replication helicase/nuclease 2                             | -2       |
|      |                 | IGSF10       | immunoglobulin superfamily, member 10                           | -2       |
|      |                 | LGSN         | lengsin, lens protein with glutamine synthetase domain          | -2       |
|      |                 | LOC101928054 | uncharacterized LOC101928054                                    | -2       |
|      |                 | ZNF43        | zinc finger protein 43                                          | -2       |
|      |                 | CD274        | CD274 molecule                                                  | -2       |
|      |                 | CDK1         | cyclin-dependent kinase 1                                       | -2       |
|      |                 | ACPP         | acid phosphatase, prostate                                      | -2       |
|      |                 | CTA-398F10.2 | novel transcript                                                | -2       |
|      |                 | FOCAD        | focadhesin                                                      | -2       |
|      |                 | MTRNR2L6     | MT-RNR2-like 6                                                  | -2       |
|      |                 | GREB1L       | growth regulation by estrogen in breast cancer-like             | -2       |
|      |                 | CDH2         | cadherin 2, type 1, N-cadherin (neuronal)                       | -2       |
|      |                 | LOC101927700 | uncharacterized LOC101927700                                    | -2       |
|      |                 | CS           | citrate synthase                                                | -2       |
|      |                 | LOC100287834 | uncharacterized LOC100287834                                    | -2       |
|      |                 | ZNF229       | zinc finger protein 229                                         | -2       |
|      |                 | GEN1         | GEN1 Holliday junction 5 flap endonuclease                      | -2       |
|      |                 | TGFB3        | transforming growth factor, beta 3                              | -2       |
|      |                 | LINC01355    | long intergenic non-protein coding RNA 1355                     | -2       |
|      |                 | RN7SKP163    | RNA, 7SK small nuclear pseudogene 163                           | -2       |
|      |                 | RP3-368A4.5  | novel transcript, sense intronic FTX                            | -2       |
|      |                 | SLC44A2      | solute carrier family 44 (choline transporter), member 2        | -2       |
|      |                 | TMEM117      | transmembrane protein 117                                       | -2       |
|      |                 | CD24         | CD24 molecule                                                   | -2       |
|      |                 | AC016644.1   | novel transcript                                                | -2       |
|      |                 | RP11-710F7.2 | novel transcript                                                | -2       |
|      |                 | SYDE2        | synapse defective 1, Rho GTPase, homolog 2 (C. elegans)         | -2       |
|      |                 | LOXL1        | lysyl oxidase-like 1                                            | -2       |
|      |                 | TNFRSF21     | tumor necrosis factor receptor superfamily, member 21           | -2       |
|      |                 | TYMS         | thymidylate synthetase                                          | -2       |

| nPTB | 2 <sup>nd</sup> | Symbol       | Title                                                                  | $\Delta$ |
|------|-----------------|--------------|------------------------------------------------------------------------|----------|
|      |                 | BST1         | bone marrow stromal cell antigen 1                                     | -2       |
|      |                 | SMG8         | SMG8 nonsense mediated mRNA decay factor                               | -2       |
|      |                 | RNU6-858P    | RNA, U6 small nuclear 858, pseudogene                                  | -2       |
|      |                 | GINS2        | GINS complex subunit 2 (Psf2 homolog)                                  | -2       |
|      |                 | LOC400541    | uncharacterized LOC400541                                              | -2       |
|      |                 | SLC39A11     | solute carrier family 39, member 11                                    | -2       |
|      |                 | DNMT1        | DNA (cytosine-5-)-methyltransferase 1                                  | -2       |
|      |                 | AP001615.9   | putative novel transcript                                              | -2       |
|      |                 | AC092597.3   | novel transcript                                                       | -2       |
|      |                 | ZNF554       | zinc finger protein 554                                                | -2       |
|      |                 | ATP6V1C2     | ATPase, H <sup>+</sup> transporting, lysosomal 42kDa, V1 subunit C2    | -2       |
|      |                 | SESN3        | sestrin 3                                                              | -2       |
|      |                 | DTWD2        | DTW domain containing 2                                                | -2       |
|      |                 | RRM2         | ribonucleotide reductase M2                                            | -2       |
|      |                 | KGFLP2       | keratinocyte growth factor-like protein 2                              | -2       |
|      |                 | PPP1R9A      | protein phosphatase 1, regulatory subunit 9A                           | -2       |
|      |                 | DGCR11       | DiGeorge syndrome critical region gene 11 (non-protein coding)         | -2       |
|      |                 | EXO1         | exonuclease 1                                                          | -2       |
|      |                 | AGAP6        | ArfGAP with GTPase domain, ankyrin repeat and PH domain 6              | -2       |
|      |                 | DTL          | denticleless E3 ubiquitin protein ligase homolog (Drosophila)          | -2       |
|      |                 | EFNB2        | ephrin-B2                                                              | -2       |
|      |                 | CASP6        | caspase 6, apoptosis-related cysteine peptidase                        | -2       |
|      |                 | COL14A1      | collagen, type XIV, alpha 1                                            | -2       |
|      |                 | LOC283299    | uncharacterized LOC283299                                              | -2       |
|      |                 | LOC101929579 | uncharacterized LOC101929579                                           | -2       |
|      |                 | COL1A1       | collagen, type I, alpha 1                                              | -2       |
|      |                 | ZNF329       | zinc finger protein 329                                                | -2       |
|      |                 | NUF2         | NUF2, NDC80 kinetochore complex component                              | -2       |
|      |                 | PHC1         | polyhomeotic homolog 1 (Drosophila)                                    | -2       |
|      |                 | GNG5P2       | guanine nucleotide binding protein (G protein), gamma 5 pseudogene 2   | -2       |
|      |                 | TPX2         | TPX2, microtubule-associated                                           | -2       |
|      |                 | ASH1L-IT1    | ASH1L intronic transcript 1 (non-protein coding)                       | -2       |
|      |                 | ARHGAP11B    | Rho GTPase activating protein 11B                                      | -2       |
|      |                 | KDM4B        | lysine (K)-specific demethylase 4B                                     | -2       |
|      |                 | TUSC3        | tumor suppressor candidate 3                                           | -2       |
|      |                 | RAB11FIP4    | RAB11 family interacting protein 4 (class II)                          | -2       |
|      |                 | KIF18A       | kinesin family member 18A                                              | -2       |
|      |                 | XRCC2        | X-ray repair complementing defective repair in Chinese hamster cells 2 | -2       |
|      |                 | RAB9BP1      | RAB9B, member RAS oncogene family pseudogene 1                         | -2       |
|      |                 | GPR126       | G protein-coupled receptor 126                                         | -2       |
|      |                 | SH3RF2       | SH3 domain containing ring finger 2                                    | -2       |
|      |                 | DIAPH3       | diaphanous-related formin 3                                            | -2       |
|      |                 | FZD3         | frizzled class receptor 3                                              | -2       |
|      |                 | PPP2R3A      | protein phosphatase 2, regulatory subunit B, alpha                     | -2       |
|      |                 | FANCD2       | Fanconi anemia, complementation group D2                               | -2       |
|      |                 | CCNB1        | cyclin B1                                                              | -2       |
|      |                 | DDAH1        | dimethylarginine dimethylaminohydrolase 1                              | -2       |
|      |                 | RNU6-208P    | RNA, U6 small nuclear 208, pseudogene                                  | -2       |
|      |                 | ATP10D       | ATPase, class V, type 10D                                              | -2       |
|      |                 | RNU2-58P     | RNA, U2 small nuclear 58, pseudogene                                   | -2       |

| nPTB | 2 <sup>nd</sup> | Symbol        | Title                                                          | $\Delta$ |
|------|-----------------|---------------|----------------------------------------------------------------|----------|
|      |                 | ORC6          | origin recognition complex, subunit 6                          | -2       |
|      |                 | SOX4          | SRY (sex determining region Y)-box 4                           | -2       |
|      |                 | SLC38A9       | solute carrier family 38, member 9                             | -2       |
|      |                 | ANKRD10-IT1   | ANKRD10 intronic transcript 1 (non-protein coding)             | -2       |
|      |                 | GPR82         | G protein-coupled receptor 82                                  | -2       |
|      |                 | BUB1          | BUB1 mitotic checkpoint serine/threonine kinase                | -2       |
|      |                 | PGAP1         | post-GPI attachment to proteins 1                              | -2       |
|      |                 | AFAP1L2       | actin filament associated protein 1-like 2                     | -2       |
|      |                 | MYO6          | myosin VI                                                      | -2       |
|      |                 | SUSD1         | sushi domain containing 1                                      | -2       |
|      |                 | CYP2D6        | cytochrome P450, family 2, subfamily D, polypeptide 6          | -2       |
|      |                 | LMNB1         | lamin B1                                                       | -2       |
|      |                 | ZNF99         | zinc finger protein 99                                         | -2       |
|      |                 | SPOPL         | speckle-type POZ protein-like                                  | -2       |
|      |                 | RP11-48B3.3   | novel transcript                                               | -2       |
|      |                 | TMEM254-AS1   | TMEM254 antisense RNA 1                                        | -2       |
|      |                 | SLC23A2       | solute carrier family 23 (ascorbic acid transporter), member 2 | -2       |
|      |                 | COL15A1       | collagen, type XV, alpha 1                                     | -2       |
|      |                 | NLRP7         | NLR family, pyrin domain containing 7                          | -2       |
|      |                 | CD200R1       | CD200 receptor 1                                               | -2       |
|      |                 | RP11-574K11.5 | putative novel transcript                                      | -2       |
|      |                 | TTC7B         | tetratricopeptide repeat domain 7B                             | -2       |
|      |                 | PBX1          | pre-B-cell leukemia homeobox 1                                 | -2       |
|      |                 | CD36          | CD36 molecule (thrombospondin receptor)                        | -2       |
|      |                 | CEP55         | centrosomal protein 55kDa                                      | -2       |
|      |                 | BRCA2         | breast cancer 2, early onset                                   | -2       |
|      |                 | LOC441601     | septin 7 pseudogene                                            | -2       |
|      |                 | MIR15B        | microRNA 15b                                                   | -2       |
|      |                 | PCDH10        | protocadherin 10                                               | -2       |
|      |                 | RNU6-1330P    | RNA, U6 small nuclear 1330, pseudogene                         | -3       |
|      |                 | RNU6-879P     | RNA, U6 small nuclear 879, pseudogene                          | -3       |
|      |                 | RNU6-850P     | RNA, U6 small nuclear 850, pseudogene                          | -3       |
|      |                 | RP4-778K6.3   | putative novel transcript                                      | -3       |
|      |                 | AC004160.4    | putative novel transcript                                      | -3       |
|      |                 | ZNF594        | zinc finger protein 594                                        | -3       |
|      |                 | NBPF1         | neuroblastoma breakpoint family, member 1                      | -3       |
|      |                 | RNU6-801P     | RNA, U6 small nuclear 801, pseudogene                          | -3       |
|      |                 | F2RL1         | coagulation factor II (thrombin) receptor-like 1               | -3       |
|      |                 | LOC643072     | uncharacterized LOC643072                                      | -3       |
|      |                 | HYAL4         | hyaluronoglucosaminidase 4                                     | -3       |
|      |                 | ARHGAP23P1    | Rho GTPase activating protein 23 pseudogene 1                  | -3       |
|      |                 | C15orf41      | chromosome 15 open reading frame 41                            | -3       |
|      |                 | AC097721.2    | novel transcript                                               | -3       |
|      |                 | CABLES1       | Cdk5 and Abl enzyme substrate 1                                | -3       |
|      |                 | RNA5SP282     | RNA, 5S ribosomal pseudogene 282                               | -3       |
|      |                 | HSD17B2       | hydroxysteroid (17-beta) dehydrogenase 2                       | -3       |
|      |                 | CCNB2         | cyclin B2                                                      | -3       |
|      |                 | PDIA6         | protein disulfide isomerase family A, member 6                 | -3       |
|      |                 | RN7SKP116     | RNA, 7SK small nuclear pseudogene 116                          | -3       |
|      |                 | CDH5          | cadherin 5, type 2 (vascular endothelium)                      | -3       |

| nPTB | 2 <sup>nd</sup> | Symbol        | Title                                                                          | $\Delta$ |
|------|-----------------|---------------|--------------------------------------------------------------------------------|----------|
|      |                 | TFPI2         | tissue factor pathway inhibitor 2                                              | -3       |
|      |                 | LILRA6        | leukocyte immunoglobulin-like receptor, subfamily A (with TM domain), member 6 | -3       |
|      |                 | ZNF681        | zinc finger protein 681                                                        | -3       |
|      |                 | RNU4-16P      | RNA, U4 small nuclear 16, pseudogene                                           | -3       |
|      |                 | CENPU         | centromere protein U                                                           | -3       |
|      |                 | GSG2          | germ cell associated 2 (haspin)                                                | -3       |
|      |                 | LINC00308     | long intergenic non-protein coding RNA 308                                     | -3       |
|      |                 | RNU6-83P      | RNA, U6 small nuclear 83, pseudogene                                           | -3       |
|      |                 | DPP4          | dipeptidyl-peptidase 4                                                         | -3       |
|      |                 | SNORD113-1    | small nucleolar RNA, C/D box 113-1                                             | -3       |
|      |                 | XAGE3         | X antigen family, member 3                                                     | -3       |
|      |                 | RNU6-1188P    | RNA, U6 small nuclear 1188, pseudogene                                         | -3       |
|      |                 | RP11-49I4.3   | novel transcript                                                               | -3       |
|      |                 | MXRA5         | matrix-remodelling associated 5                                                | -3       |
|      |                 | GUCY1A3       | guanylate cyclase 1, soluble, alpha 3                                          | -3       |
|      |                 | PSG9          | pregnancy specific beta-1-glycoprotein 9                                       | -3       |
|      |                 | RNA5SP424     | RNA, 5S ribosomal pseudogene 424                                               | -3       |
|      |                 | CTD-2562J17.7 | novel transcript                                                               | -3       |
|      |                 | CCDC81        | coiled-coil domain containing 81                                               | -3       |
|      |                 | KIAA0101      | KIAA0101                                                                       | -3       |
|      |                 | ASPN          | asporin                                                                        | -3       |
|      |                 | LOC101929607  | uncharacterized LOC101929607                                                   | -3       |
|      |                 | LOC644919     | uncharacterized LOC644919                                                      | -3       |
|      |                 | RP1-69D17.3   | putative novel transcript                                                      | -3       |
|      |                 | NDC80         | NDC80 kinetochore complex component                                            | -3       |
|      |                 | DSCC1         | DNA replication and sister chromatid cohesion 1                                | -3       |
|      |                 | RP11-337C18.8 | novel transcript                                                               | -3       |
|      |                 | ARHGAP11A     | Rho GTPase activating protein 11A                                              | -3       |
|      |                 | SHCBP1        | SHC SH2-domain binding protein 1                                               | -3       |
|      |                 | LPHN3         | latrophilin 3                                                                  | -3       |
|      |                 | GPR115        | G protein-coupled receptor 115                                                 | -3       |
|      |                 | NUSAP1        | nucleolar and spindle associated protein 1                                     | -3       |
|      |                 | RNU6-512P     | RNA, U6 small nuclear 512, pseudogene                                          | -3       |
|      |                 | GATSL2        | GATS protein-like 2                                                            | -3       |
|      |                 | SNORD114-28   | small nucleolar RNA, C/D box 114-28                                            | -3       |
|      |                 | LOC102724842  | uncharacterized LOC102724842                                                   | -3       |
|      |                 | RNU6-960P     | RNA, U6 small nuclear 960, pseudogene                                          | -3       |
|      |                 | SNORD114-26   | small nucleolar RNA, C/D box 114-26                                            | -3       |
|      |                 | KIF14         | kinesin family member 14                                                       | -3       |
|      |                 | CLSPN         | claspin                                                                        | -3       |
|      |                 | NAIP          | NLR family, apoptosis inhibitory protein                                       | -3       |
|      |                 | FAR2P1        | fatty acyl CoA reductase 2 pseudogene 1                                        | -3       |
|      |                 | CTD-2306M5.1  | novel transcript                                                               | -3       |
|      |                 | ASPM          | asp (abnormal spindle) homolog, microcephaly associated (Drosophila)           | -3       |
|      |                 | ELOVL2        | ELOVL fatty acid elongase 2                                                    | -3       |
|      |                 | HELLS         | helicase, lymphoid-specific                                                    | -3       |
|      |                 | HAPLN1        | hyaluronan and proteoglycan link protein 1                                     | -3       |
|      |                 | RNU6-971P     | RNA, U6 small nuclear 971, pseudogene                                          | -3       |
|      |                 | MELK          | maternal embryonic leucine zipper kinase                                       | -3       |
|      |                 | LOC101929381  | uncharacterized LOC101929381                                                   | -3       |

| nPTB | 2 <sup>nd</sup> | Symbol        | Title                                                           | $\Delta$ |
|------|-----------------|---------------|-----------------------------------------------------------------|----------|
|      |                 | RN7SKP42      | RNA, 7SK small nuclear pseudogene 42                            | -3       |
|      |                 | PABPC4L       | poly(A) binding protein, cytoplasmic 4-like                     | -3       |
|      |                 | RNU6-623P     | RNA, U6 small nuclear 623, pseudogene                           | -3       |
|      |                 | POT1-AS1      | POT1 antisense RNA 1                                            | -3       |
|      |                 | CDYL2         | chromodomain protein, Y-like 2                                  | -3       |
|      |                 | RNU6-780P     | RNA, U6 small nuclear 780, pseudogene                           | -3       |
|      |                 | KAL1          | Kallmann syndrome 1 sequence                                    | -3       |
|      |                 | ERBB3         | v-erb-b2 avian erythroblastic leukemia viral oncogene homolog 3 | -4       |
|      |                 | ZNF283        | zinc finger protein 283                                         | -4       |
|      |                 | FMOD          | fibromodulin                                                    | -4       |
|      |                 | LAMA2         | laminin, alpha 2                                                | -4       |
|      |                 | PDIA5         | protein disulfide isomerase family A, member 5                  | -4       |
|      |                 | METTL7A       | methyltransferase like 7A                                       | -4       |
|      |                 | CENPE         | centromere protein E, 312kDa                                    | -4       |
|      |                 | F5            | coagulation factor V (proaccelerin, labile factor)              | -4       |
|      |                 | ANKRD36BP2    | ankyrin repeat domain 36B pseudogene 2                          | -4       |
|      |                 | HNRNPA1P33    | heterogeneous nuclear ribonucleoprotein A1 pseudogene 33        | -4       |
|      |                 | MEST          | mesoderm specific transcript                                    | -4       |
|      |                 | CKAP2         | cytoskeleton associated protein 2                               | -4       |
|      |                 | KIF11         | kinesin family member 11                                        | -4       |
|      |                 | DPT           | dermatopontin                                                   | -4       |
|      |                 | CASC5         | cancer susceptibility candidate 5                               | -4       |
|      |                 | MIR580        | microRNA 580                                                    | -4       |
|      |                 | VIT           | vitrin                                                          | -4       |
|      |                 | CENPH         | centromere protein H                                            | -4       |
|      |                 | RNU6-1170P    | RNA, U6 small nuclear 1170, pseudogene                          | -4       |
|      |                 | SCARNA9L      | small Cajal body-specific RNA 9-like                            | -4       |
|      |                 | RNU6-77P      | RNA, U6 small nuclear 77, pseudogene                            | -4       |
|      |                 | RAD51         | RAD51 recombinase                                               | -4       |
|      |                 | RNU6-375P     | RNA, U6 small nuclear 375, pseudogene                           | -4       |
|      |                 | MIR205HG      | MIR205 host gene (non-protein coding)                           | -4       |
|      |                 | RNU6-595P     | RNA, U6 small nuclear 595, pseudogene                           | -4       |
|      |                 | AC009262.2    | putative novel transcript                                       | -5       |
|      |                 | RNU6-308P     | RNA, U6 small nuclear 308, pseudogene                           | -5       |
|      |                 | FGF7          | fibroblast growth factor 7                                      | -5       |
|      |                 | BRIP1         | BRCA1 interacting protein C-terminal helicase 1                 | -5       |
|      |                 | RNU6-151P     | RNA, U6 small nuclear 151, pseudogene                           | -5       |
|      |                 | LRP2          | low density lipoprotein receptor-related protein 2              | -5       |
|      |                 | TSPAN2        | tetraspanin 2                                                   | -5       |
|      |                 | NPPB          | natriuretic peptide B                                           | -5       |
|      |                 | HIST1H3B      | histone cluster 1, H3b                                          | -5       |
|      |                 | RNU2-63P      | RNA, U2 small nuclear 63, pseudogene                            | -5       |
|      |                 | RNU6-560P     | RNA, U6 small nuclear 560, pseudogene                           | -6       |
|      |                 | COL1A2        | collagen, type I, alpha 2                                       | -6       |
|      |                 | MIR515-1      | microRNA 515-1                                                  | -6       |
|      |                 | COL3A1        | collagen, type III, alpha 1                                     | -6       |
|      |                 | PRSS12        | protease, serine, 12 (neurotrypsin, motopsin)                   | -6       |
|      |                 | HGF           | hepatocyte growth factor (hepapoietin A; scatter factor)        | -7       |
|      |                 | RNU6-606P     | RNA, U6 small nuclear 606, pseudogene                           | -7       |
|      |                 | RP11-308B16.2 | putative novel transcript                                       | -7       |

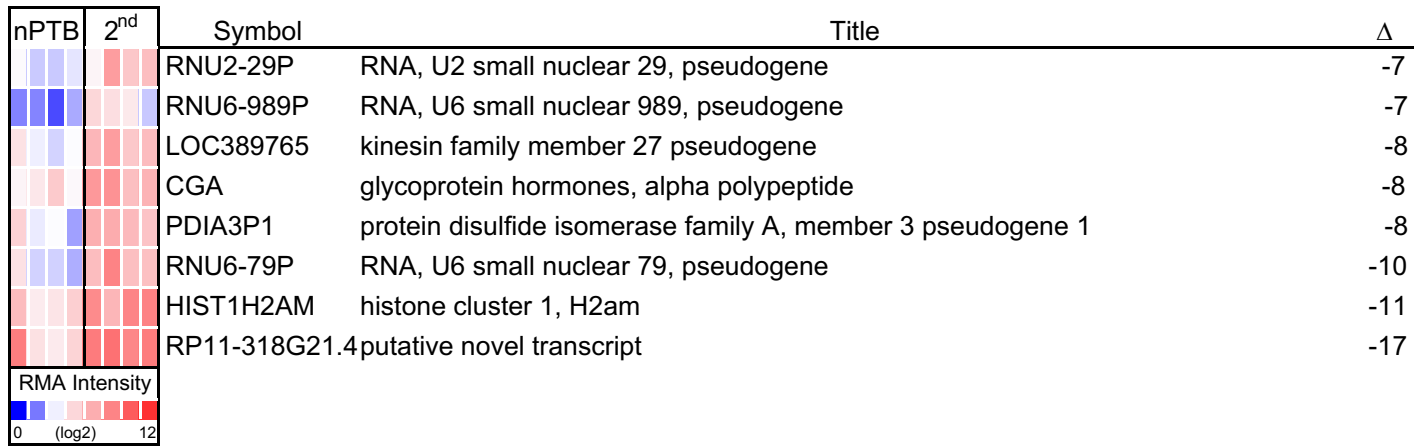

**Supplemental Figure 5.** Global gene expression profiles of schCTBs isolated by laser capture microdissection from the fetal membranes: non infected preterm birth (nPTB) as compared to the late second trimester of normal pregnancy (2<sup>nd</sup>) (n=4/group). The heatmap lists genes that were differentially expressed by 2-fold or greater.

Table S1. Maternal and neonatal characteristics (morphology, immunolocalization, invasion and proliferation experiments).

|                                    | <b>sPE (n=7)*</b> | <b>nPTB (n=5)*</b> | <b>P value**</b> |
|------------------------------------|-------------------|--------------------|------------------|
| Maternal age (years)               | 27.86 (2.94)      | 30.20 (2.22)       | > 0.05           |
| BMI, Kg/m <sup>2</sup>             | 29.90 (2.12)      | 24.06 (1.19)       | > 0.05           |
| Systolic blood pressure, mmHg      | 150.5 (6.58)      | 116.5 (4.34)       | < 0.01           |
| Diastolic blood pressure, mmHg     | 88 (3.56)         | 68.2 (3.86)        | < 0.01           |
| Proteinuria                        | +1 to +3          | 0 or NA            | < 0.05           |
| Gestational age at delivery (week) | 30.93 (1.42)      | 32.87 (0.66)       | > 0.05           |
| Birth weight, g                    | 1264.29 (307.02)  | 1957.6 (154.19)    | < 0.05           |

\* mean ± SD

\*\* 2-tailed Student's t-test

NA: Not available



Table S2. Maternal and neonatal characteristics (transcriptional profiling).

|                                     | <b>sPE (n=4)*</b> | <b>nPTB (n=4)*</b> | <b>P value**</b> |
|-------------------------------------|-------------------|--------------------|------------------|
| Maternal age (years)                | 29.0 (3.34)       | 31.7 (2.3)         | > 0.05           |
| BMI, Kg/m <sup>2</sup>              | 29.95 (3.59)      | 25.0 (1.89)        | > 0.05           |
| Systolic blood pressure, mmHg       | 152.0 (6.58)      | 117.8 (7.82)       | < 0.02           |
| Diastolic blood pressure, mmHg      | 91.62 (3.25)      | 72.7 (4.97)        | < 0.02           |
| Proteinuria                         | +1 to +3          | 0 or NA            | < 0.05           |
| Gestational age at delivery (weeks) | 26.0 (3.76)       | 32.4 (0.82)        | > 0.05           |
| Birth weight (grams)                | 908.75 (177.82)   | 2083.3 (207.87)    | < 0.01           |

\* mean ± SD

\*\* 2-tailed Student's t-test

NA: Not available

Table S3. Antibodies

| <b>Antibody</b>          | <b>Catalog Number/ Clone</b> | <b>Source</b>            | <b>Concentration<br/>(<math>\mu\text{g/ml}</math>)</b> |
|--------------------------|------------------------------|--------------------------|--------------------------------------------------------|
| Vimentin                 | V4630                        | Sigma Aldrich            | 72.6                                                   |
| CK7                      | 7D3                          | Damsky et al., 1992*     | 26                                                     |
| HLA-G                    | 4H84                         | McMaster et al., 1998**  | 20                                                     |
| ITGA4                    | NBP1-77333                   | Novus Biologicals        | 10                                                     |
| E-cadherin               | 36/E-cadherin                | BD Biosciences           | 2.5                                                    |
| hPL                      | MCA331                       | Serotec                  | 50                                                     |
| GSTA3                    | sc-100547                    | Santa Cruz Biotechnology | 1                                                      |
| PAPP-A                   | ab203683                     | Abcam                    | 10                                                     |
| anti-rabbit secondary Ab | A21206                       | Life Technologies        | 2                                                      |
| anti-goat secondary Ab   | A11055                       | Life Technologies        | 2                                                      |
| anti-mouse secondary Ab  | A21907                       | Life Technologies        | 2                                                      |
| anti-rat secondary Ab    | 712-025-153                  | Jackson ImmunoResearch   | 15                                                     |

\*Damsky C, et al 1992. Distribution patterns of extracellular matrix components and adhesion receptors are intricately modulated during first trimester cytotrophoblast differentiation along the invasive pathway, in vivo. *J Clin Invest.* 89: 210-22

\*\*McMaster M, et al 1998. HLA-G isoforms produced by placental cytotrophoblasts and found in amniotic fluid are due to unusual glycosylation. *J Immunol.* 160(12) 5922-8.
